# Supplementary material for: KMnO4/AcOH-mediated C3-selective direct arylation of coumarins with arylboronic acids
Source: Royal Society of Chemistry journal article supplement (doi:10.1039/c6ra04787d), 2016-01-01
Supplement: c6ra04787d1.pdf [file c6ra04787d1.pdf]

# Supporting Information

## **KMnO<sub>4</sub>/AcOH-mediated C3-selective Direct Arylation of coumarins with Arylboronic acids**

Jin-Wei Yuan,\* Liang-Ru Yang, Qiu-Yue Yin, Pu Mao, and Ling-Bo Qu\*

School of Chemistry & Chemical Engineering, Henan University of Technology, Zhengzhou  
450001, PR China

\*Corresponding authors, E-mail: [yuanjinweigs@126.com](mailto:yuanjinweigs@126.com) (Jin-Wei Yuan);

[qulingbo@haut.edu.cn](mailto:qulingbo@haut.edu.cn) (Ling-Bo Qu)

---

### **Contents**

1. Screening of the reaction conditions
2. Copies of spectra of products

## 1. Screening of the reaction conditions

**Table S1** The yields of 3-phenylcoumarin was affected by the amount of  $\text{KMnO}_4$ <sup>a</sup>

| Entry | $\text{KMnO}_4$ (eq.) | Yields <sup>b</sup> (%) |
|-------|-----------------------|-------------------------|
| 1     | 0.2                   | 30                      |
| 2     | 1.0                   | 60                      |
| 3     | 2.0                   | 75                      |
| 4     | 3.0                   | 76                      |
| 5     | 4.0                   | 75                      |

<sup>a</sup> Reaction conditions: a solution of  $\text{KMnO}_4$  (1.0 mmol, 158 mg) in 20 mL AcOH was stirred under reflux until the purple color of  $\text{KMnO}_4$  turn brown (20 min). After the reaction was cooled to room temperature, coumarins **1a** (0.5 mmol, 73 mg) and phenylboronic acid **2a** (1.0 mmol, 122 mg) were added and the reaction was continued at 120 °C for 1.0 h.

<sup>b</sup> Isolated yield.

**Table S2** The yields of 3-phenylcoumarin was affected by the molar ratio of coumarin **1a** and phenylboronic acid **2a**<sup>a</sup>

| Entry | The molar ratio of <b>1a</b> and <b>2a</b> | Yields <sup>b</sup> (%) |
|-------|--------------------------------------------|-------------------------|
| 1     | 2:1                                        | 35                      |
| 2     | 1:1                                        | 65                      |
| 3     | 1:2                                        | 75                      |
| 4     | 1:3                                        | 72                      |
| 5     | 1:4                                        | 70                      |

<sup>a</sup> Reaction conditions: a solution of  $\text{KMnO}_4$  (1.0 mmol, 158 mg) in 20 mL AcOH was stirred under reflux until the purple color of  $\text{KMnO}_4$  turn brown (20 min). After the reaction was cooled to room temperature, coumarins **1a** (0.5 mmol, 73 mg) and phenylboronic acid **2a** were added and the reaction was continued at 120 °C for 1.0 h.

<sup>b</sup> Isolated yield.

## 2. Copies of spectra of products

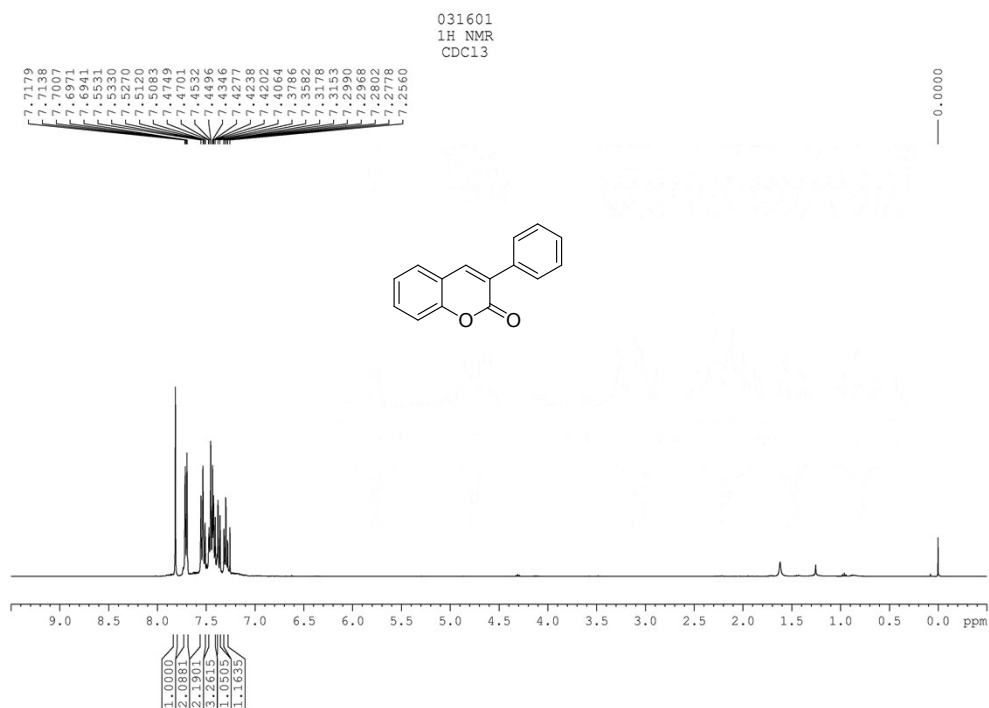

Fig. S1 <sup>1</sup>H NMR spectrum of **3a**

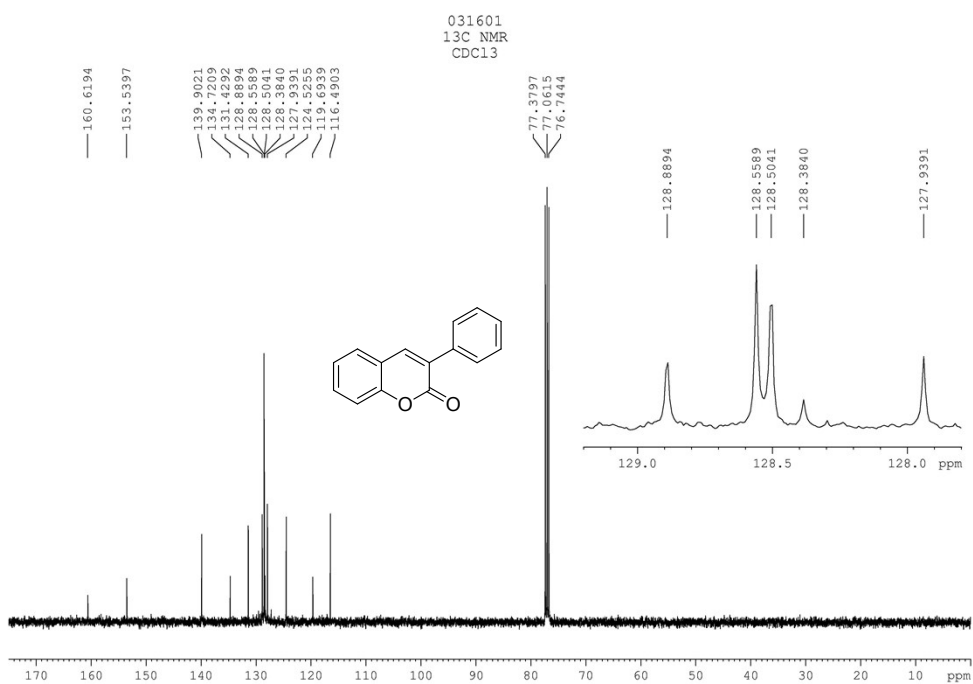

Fig. S2 <sup>13</sup>C NMR spectrum of **3a**

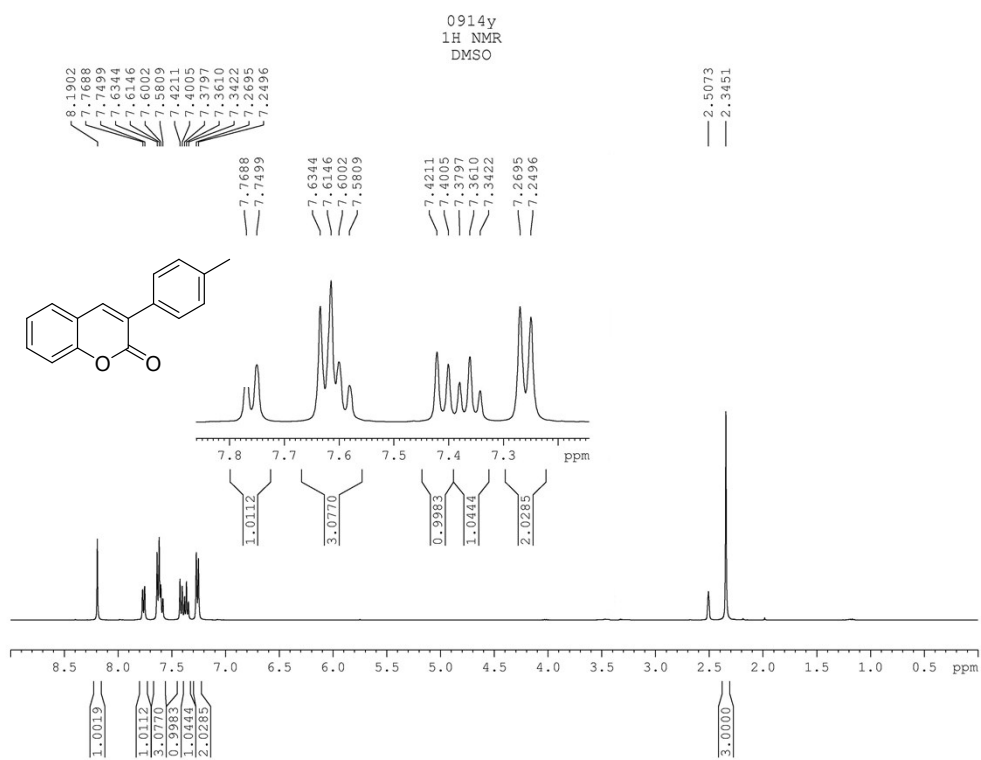

Fig. S3 <sup>1</sup>H NMR spectrum of 3b

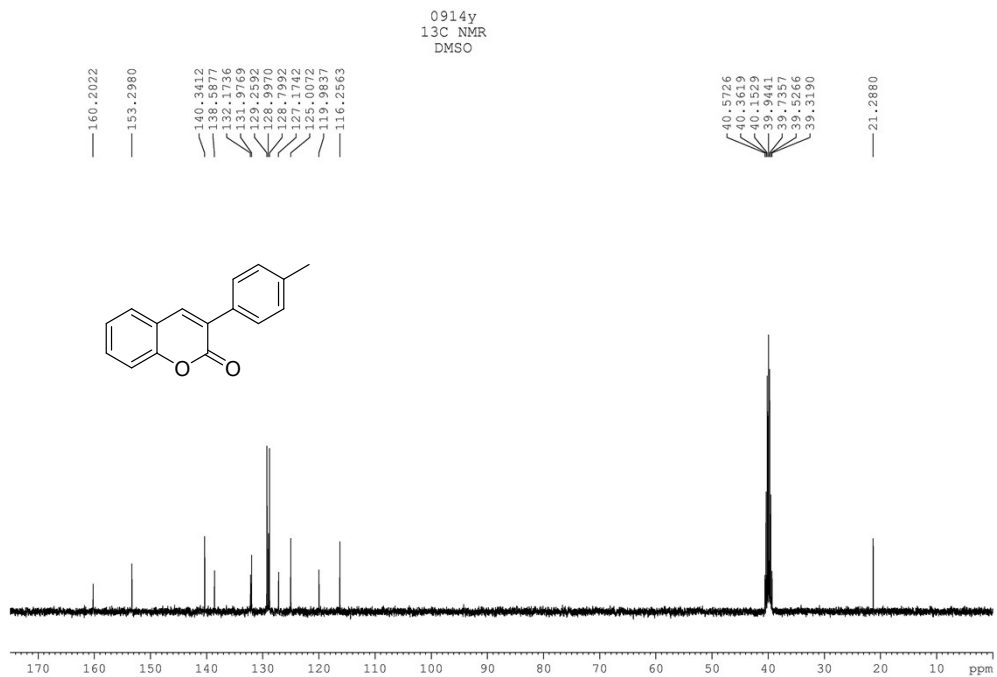

Fig. S4 <sup>13</sup>C NMR spectrum of 3b

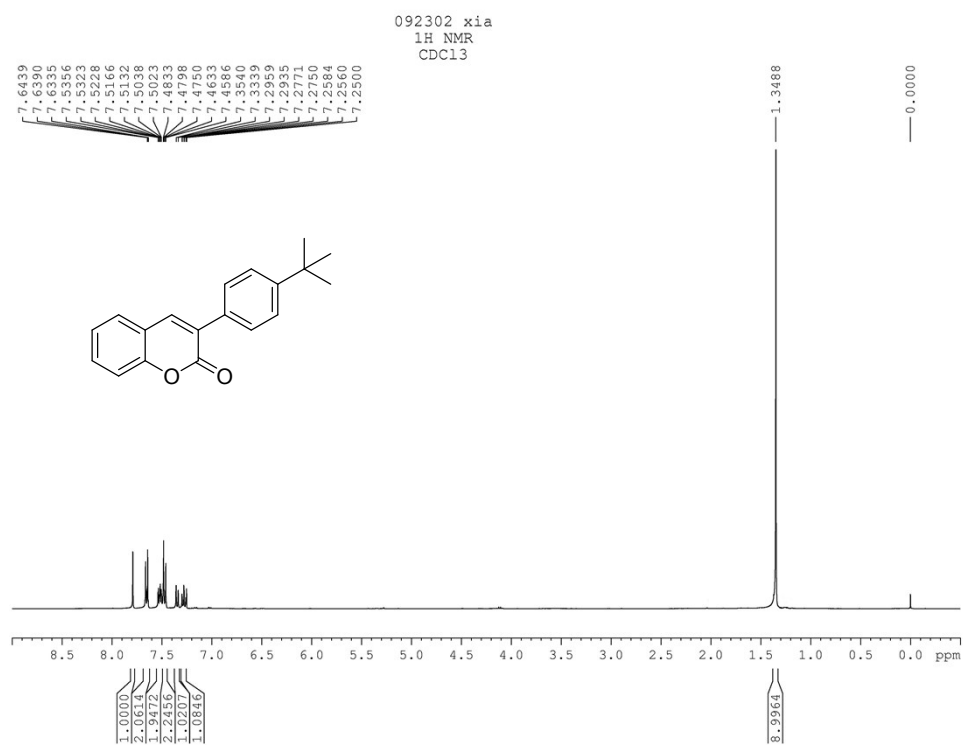

Fig. S5  $^1\text{H}$  NMR spectrum of **3c**

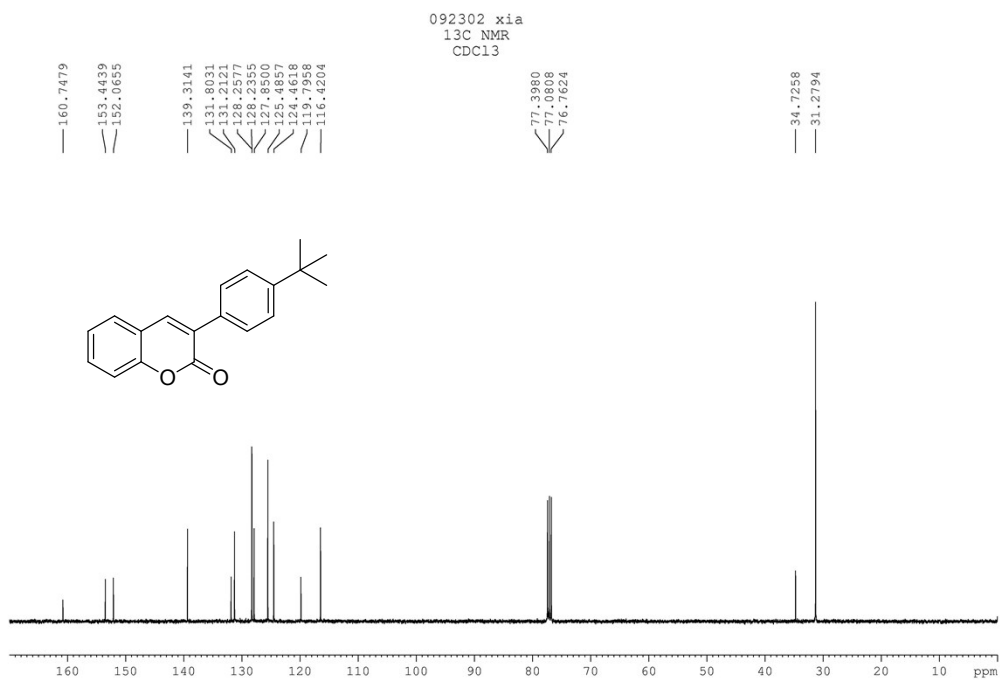

Fig. S6  $^{13}\text{C}$  NMR spectrum of **3c**

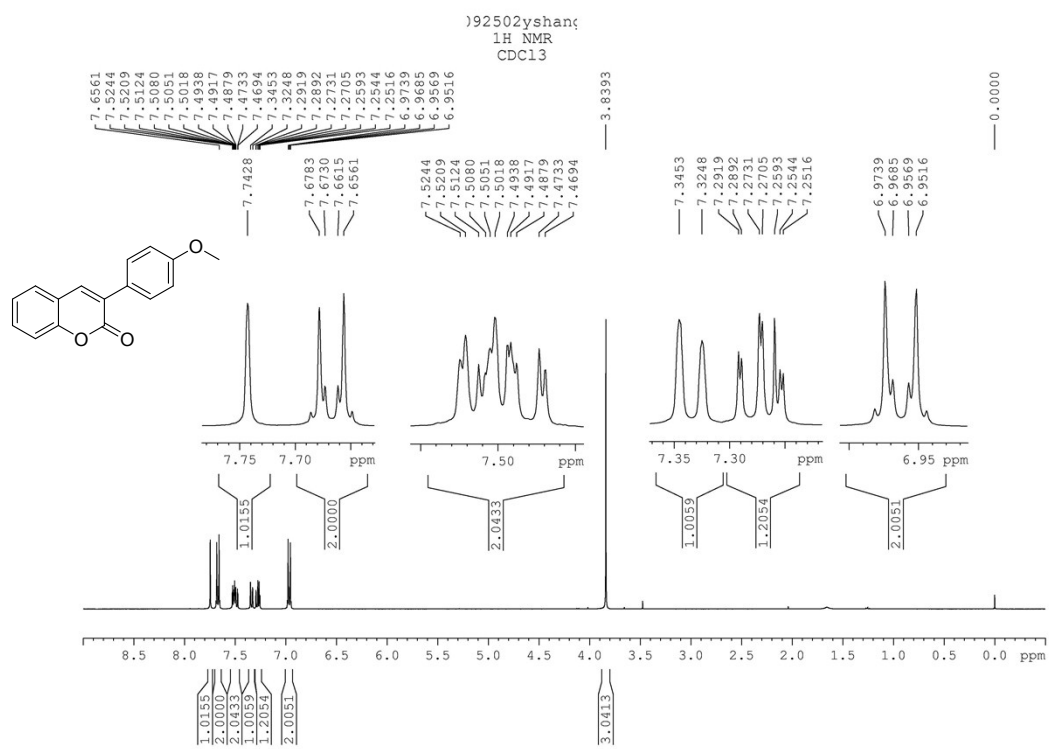

Fig. S7 <sup>1</sup>H NMR spectrum of 3d

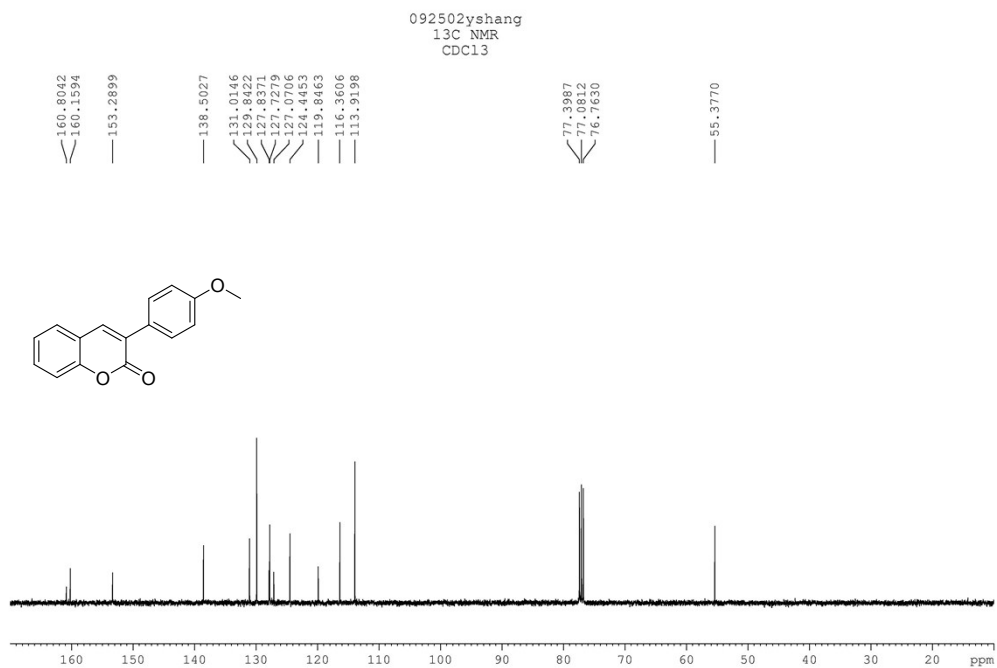

Fig. S8 <sup>13</sup>C NMR spectrum of 3d

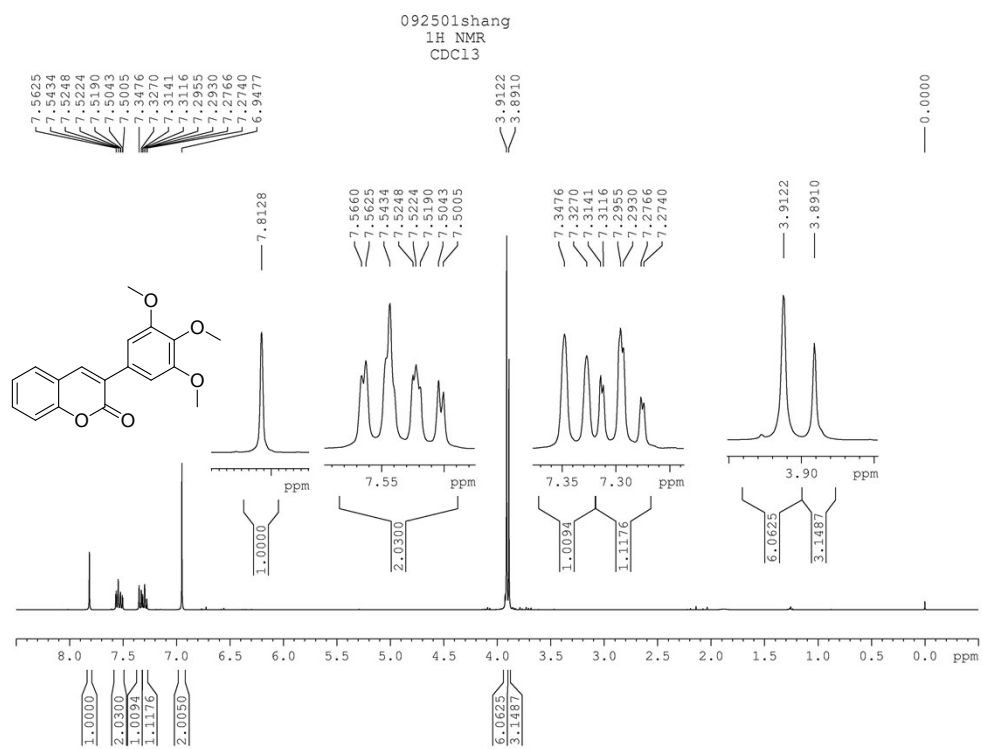

Fig. S9 <sup>1</sup>H NMR spectrum of **3e**

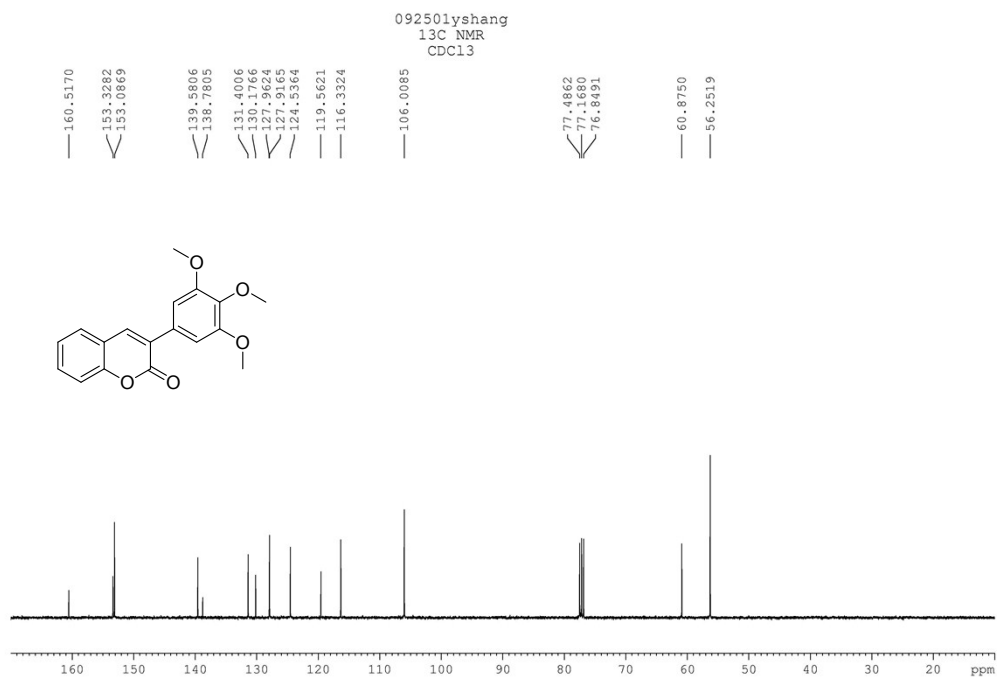

Fig. S10 <sup>13</sup>C NMR spectrum of **3e**

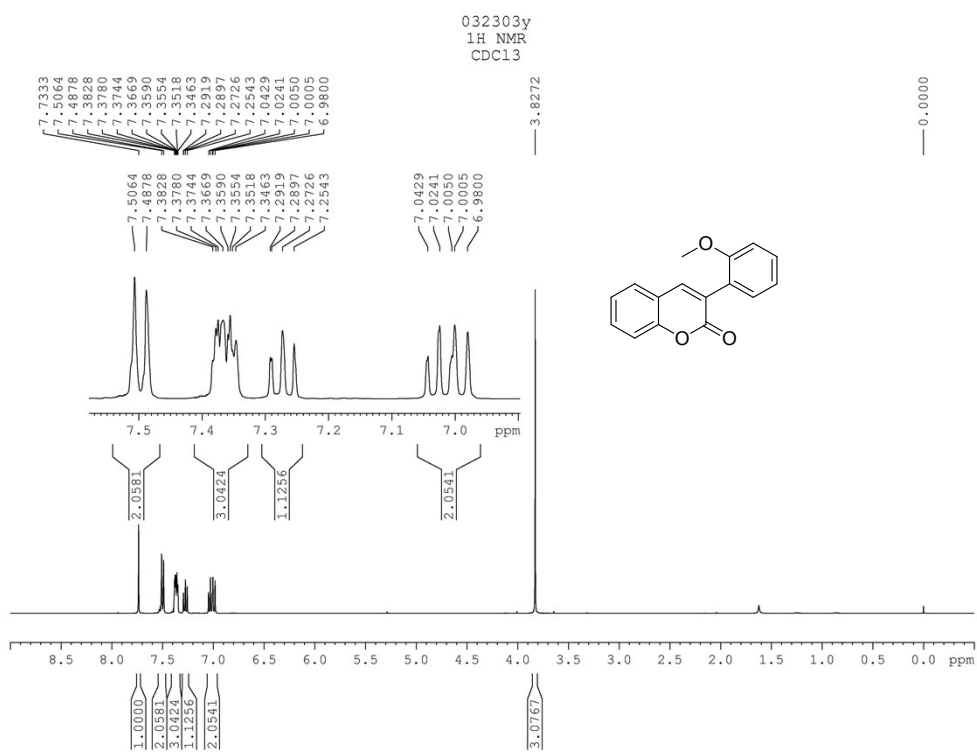

Fig. S11 <sup>1</sup>H NMR spectrum of 3f

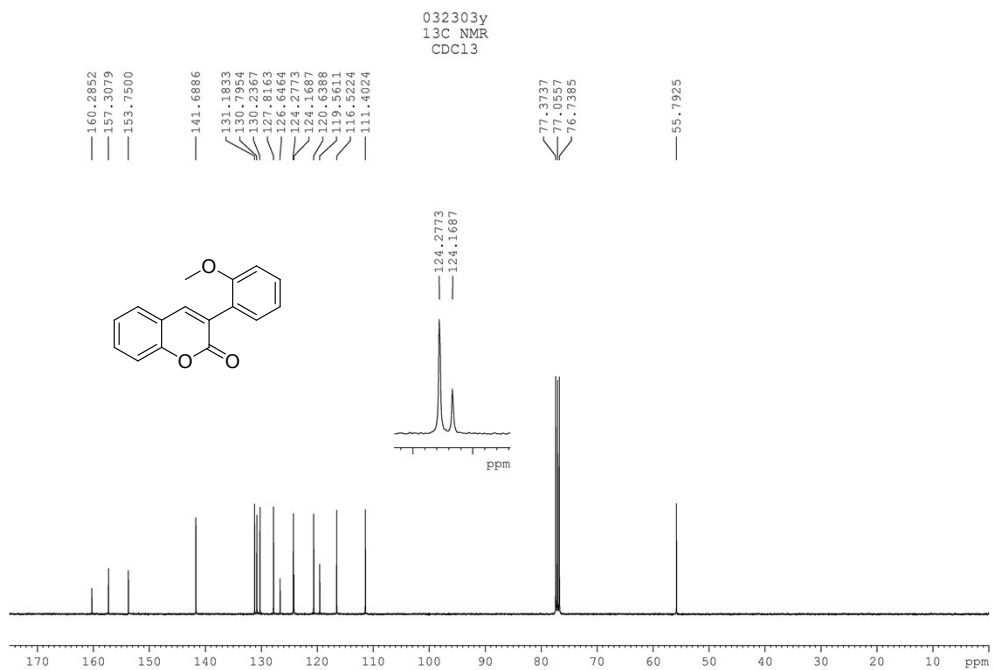

Fig. S12 <sup>13</sup>C NMR spectrum of 3f



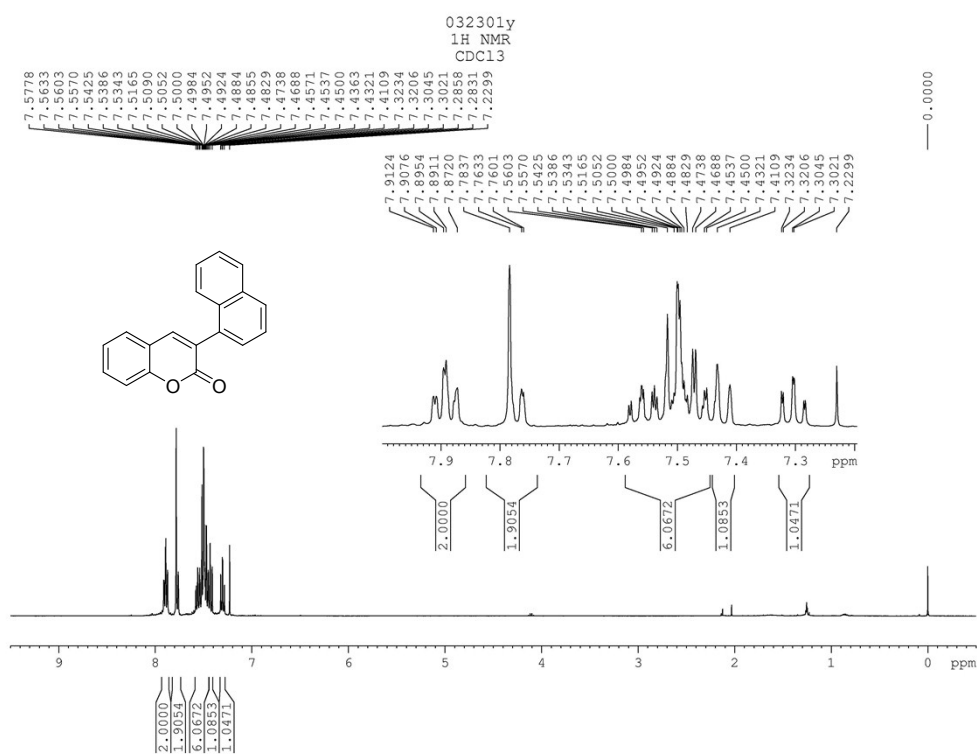

Fig. S13 <sup>1</sup>H NMR spectrum of 3g

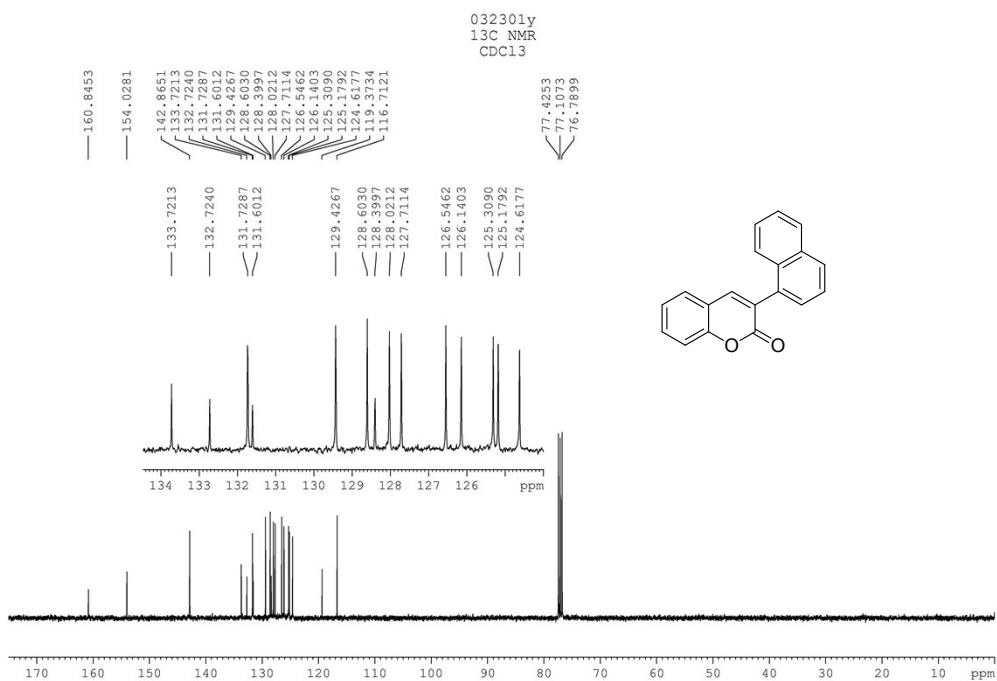

Fig. S14 <sup>13</sup>C NMR spectrum of 3g

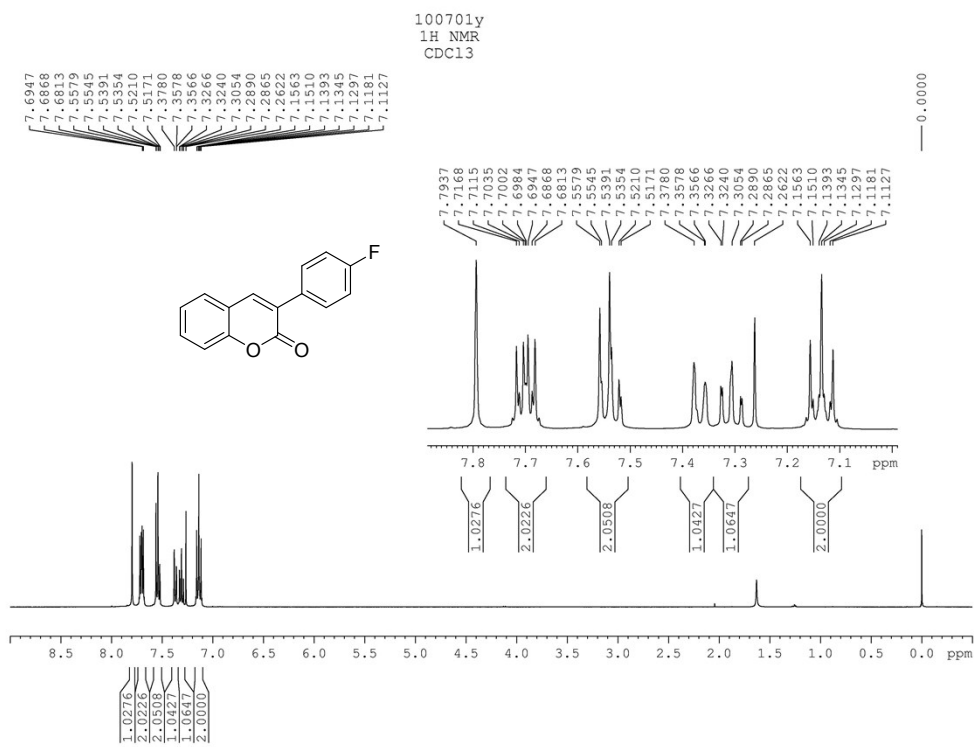

Fig. S15  $^1\text{H}$  NMR spectrum of 3h

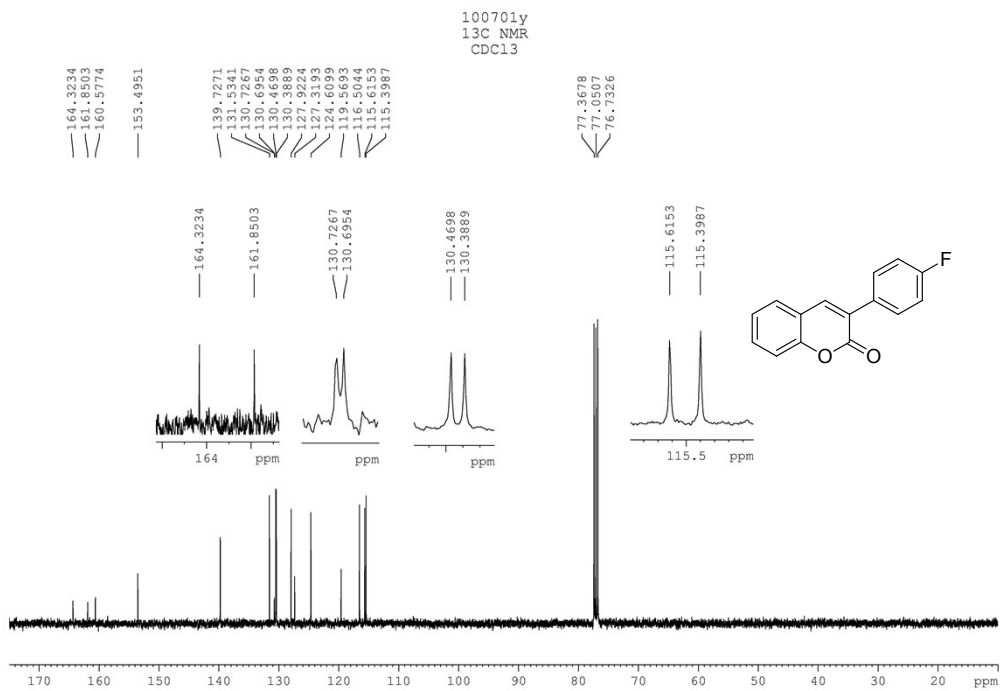

Fig. S16  $^{13}\text{C}$  NMR spectrum of 3h

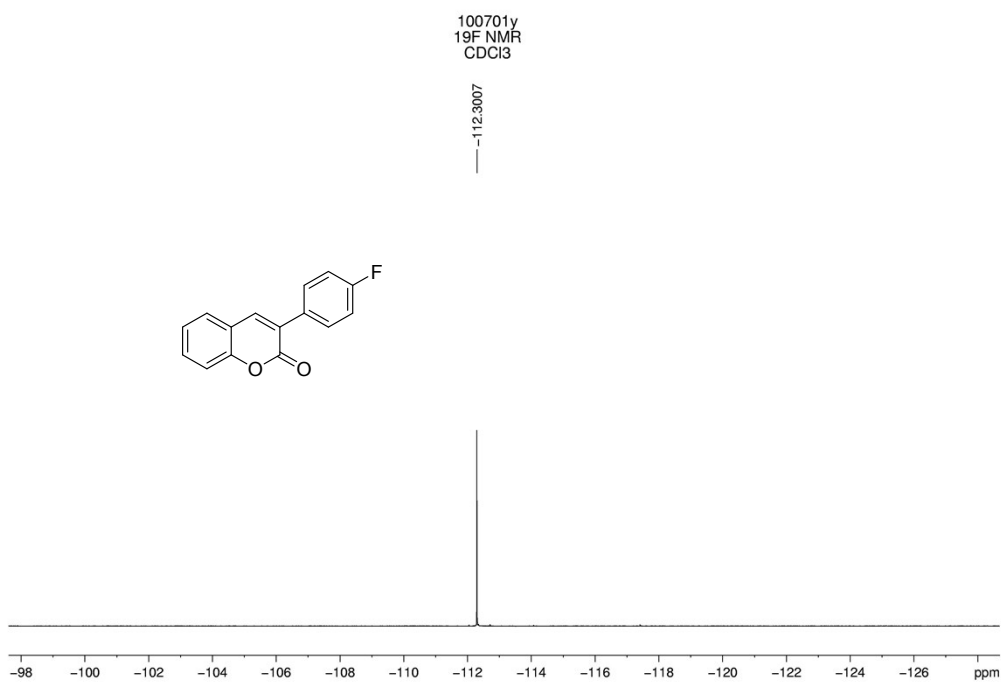

Fig. S17 <sup>19</sup>F NMR spectrum of 3h

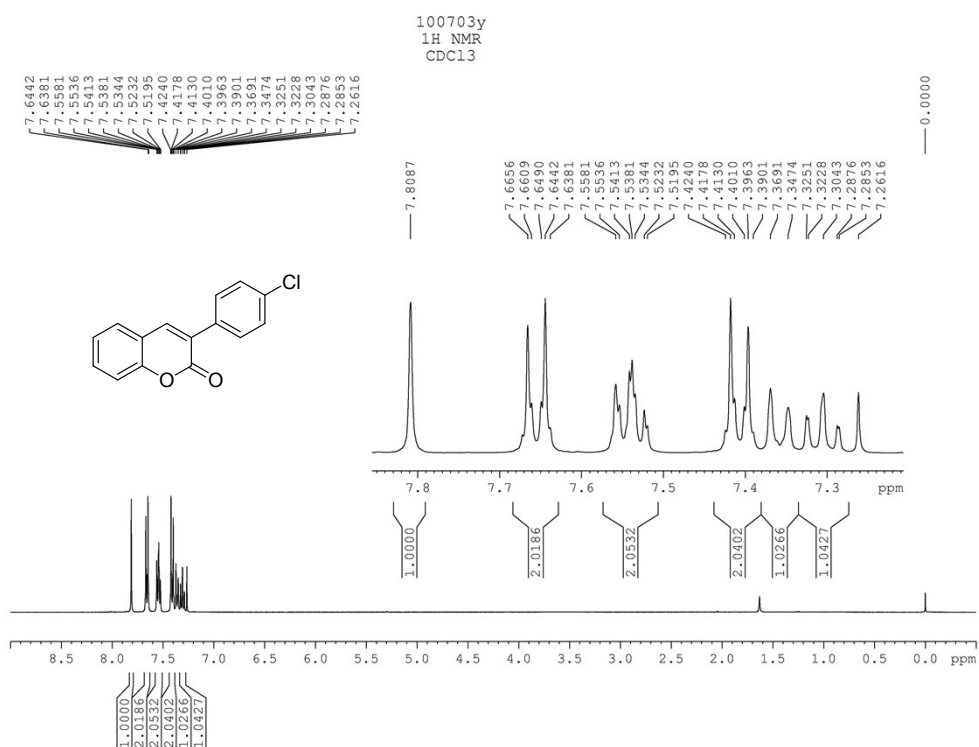

Fig. S18 <sup>1</sup>H NMR spectrum of 3i

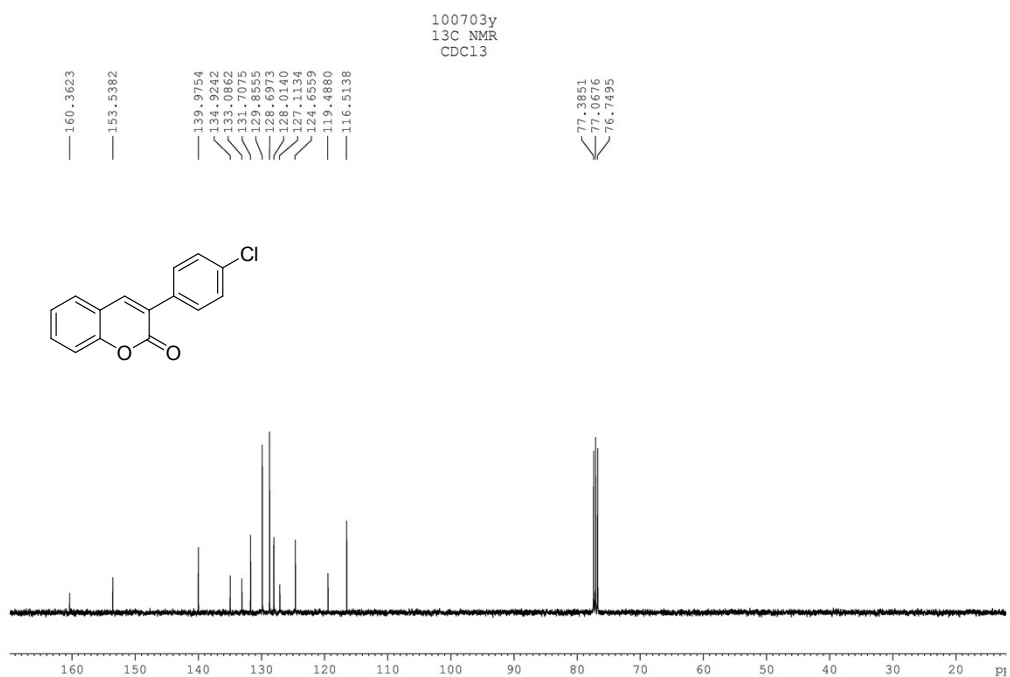

Fig. S19 <sup>13</sup>C NMR spectrum of **3i**

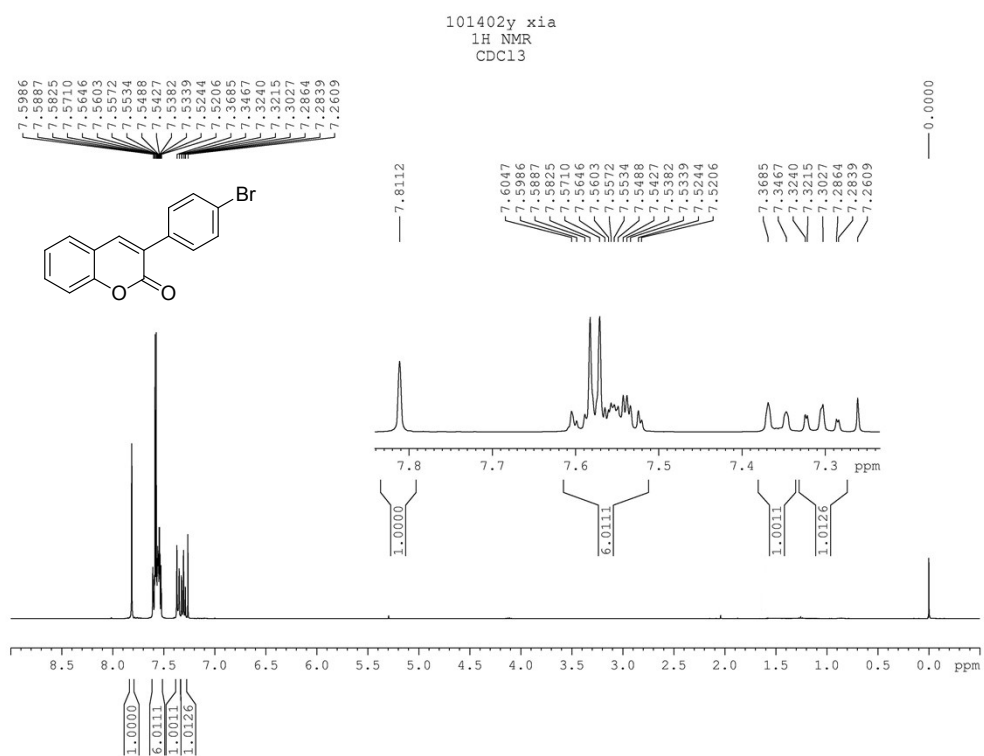

Fig. S20 <sup>1</sup>H NMR spectrum of **3j**

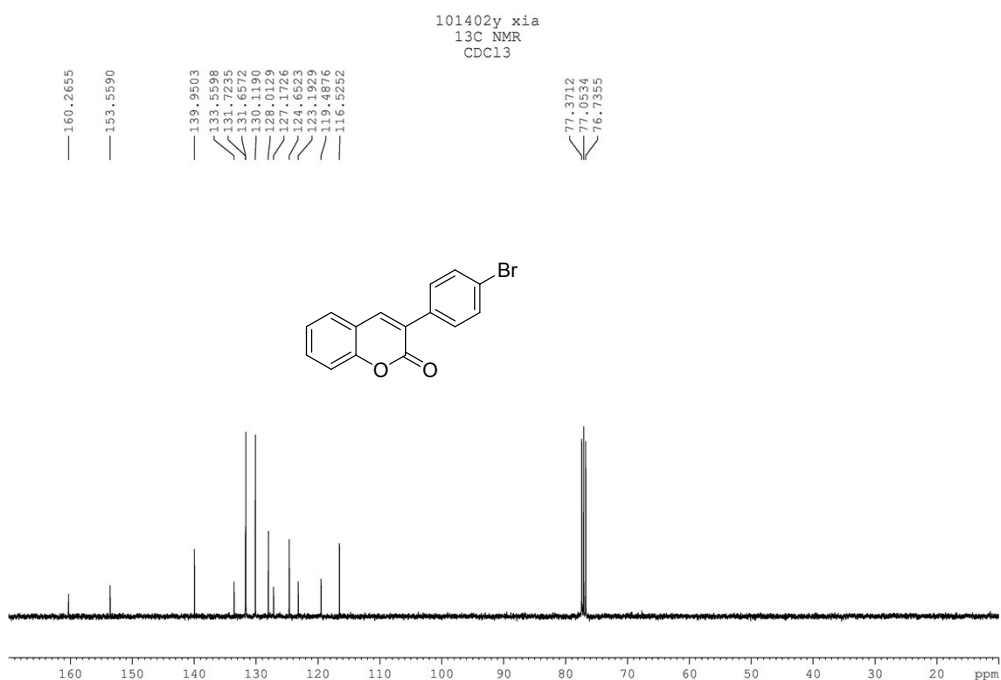

Fig. S21 <sup>13</sup>C NMR spectrum of 3j

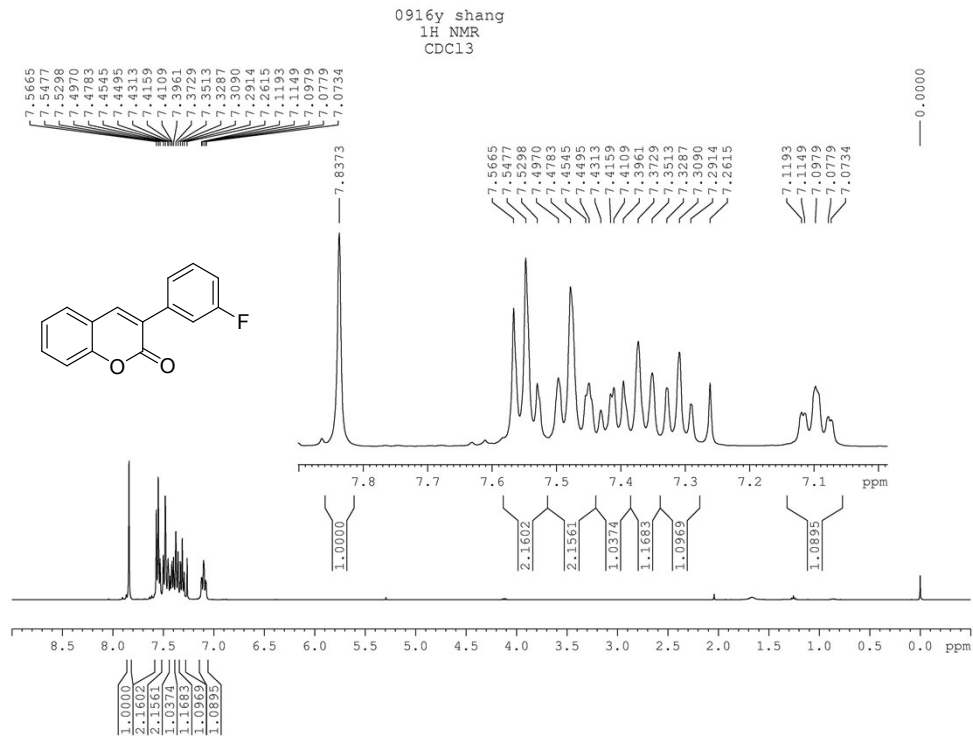

Fig. S22 <sup>1</sup>H NMR spectrum of 3k

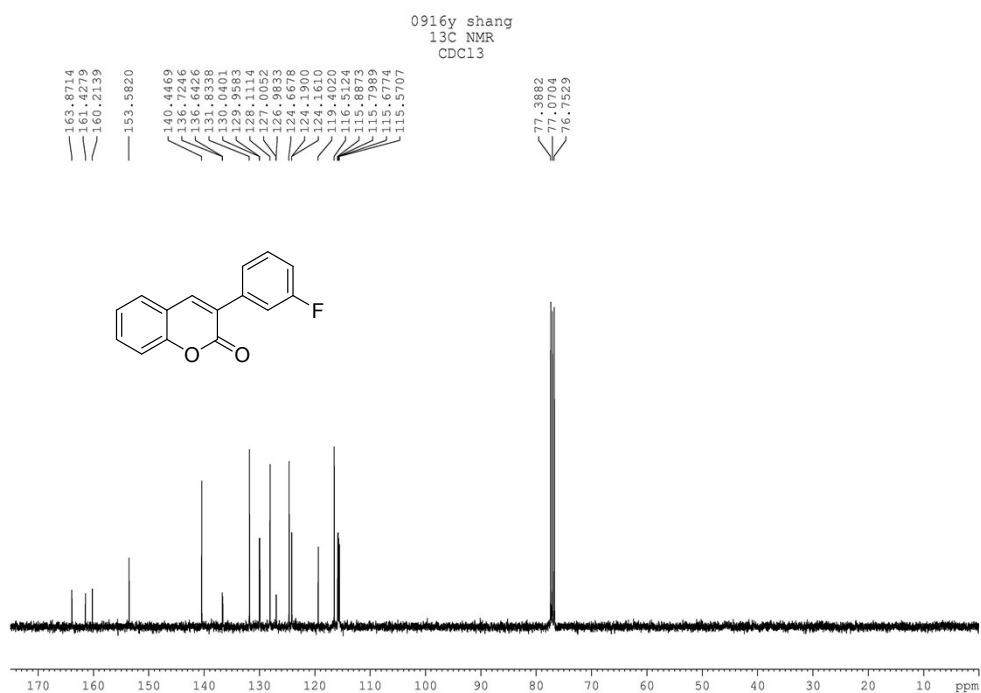

Fig. S23 <sup>13</sup>C NMR spectrum of 3k

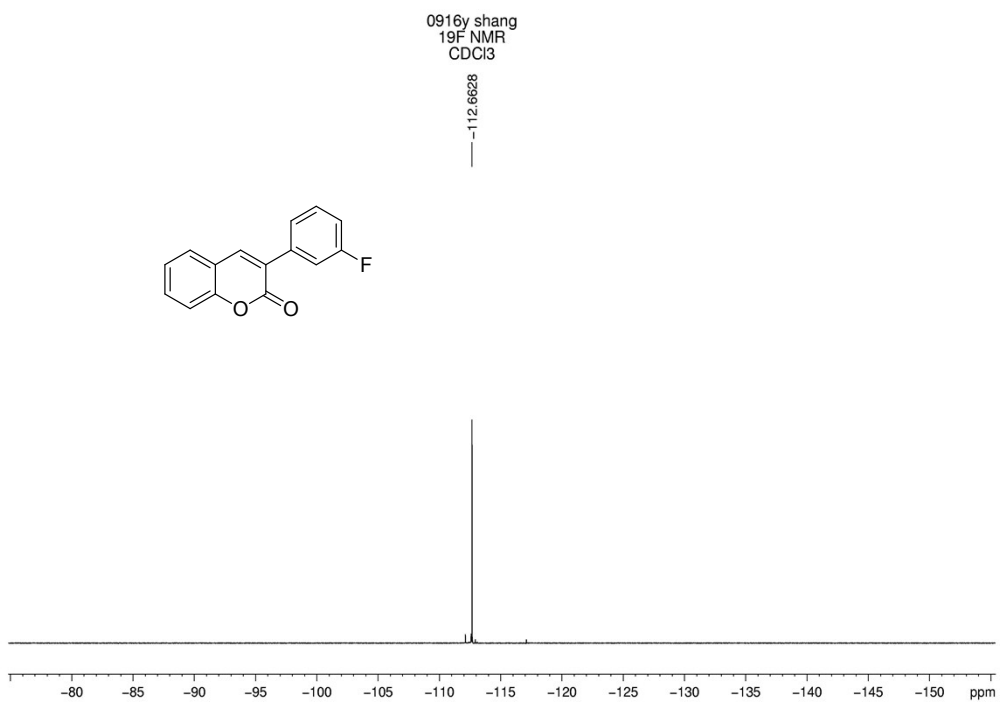

Fig. S24 <sup>19</sup>F NMR spectrum of 3k

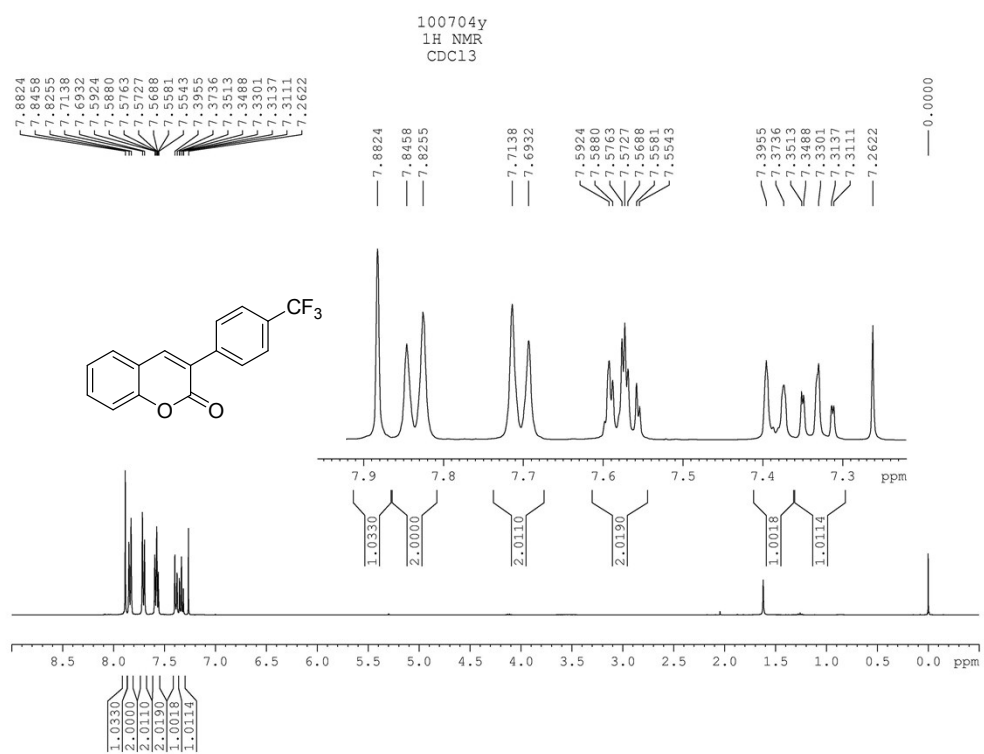

Fig. S25 <sup>1</sup>H NMR spectrum of 3I

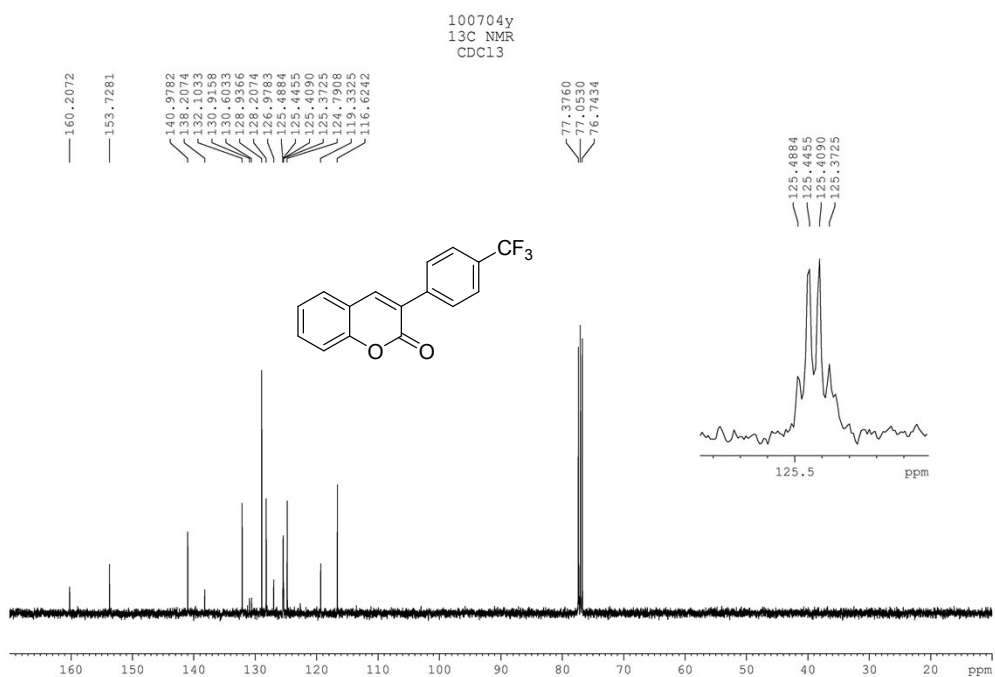

Fig. S26 <sup>13</sup>C NMR spectrum of 3I

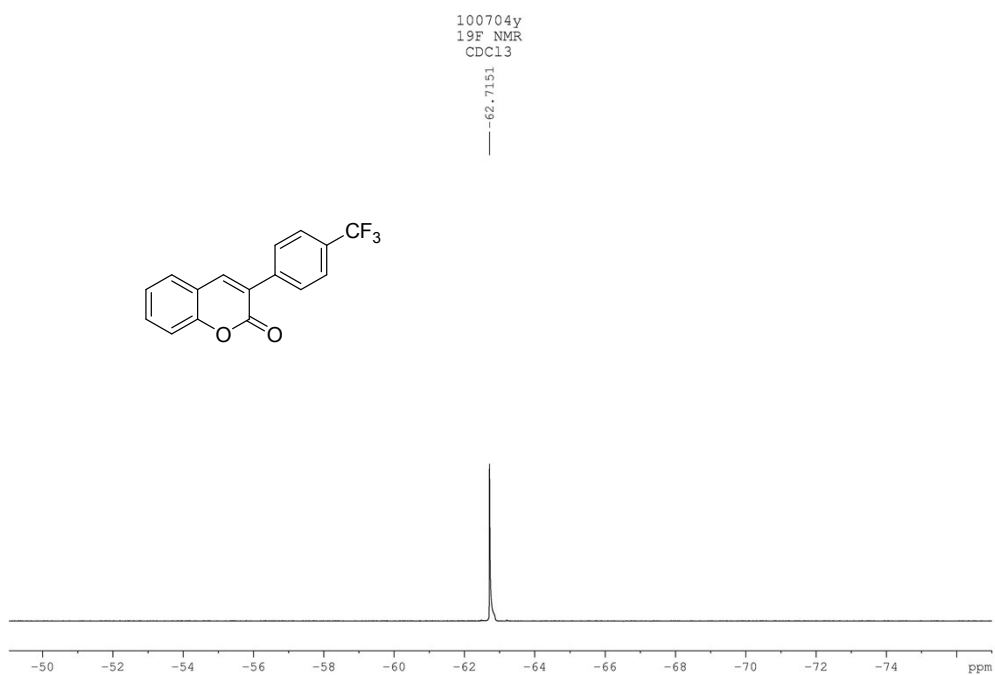

Fig. S27 <sup>19</sup>F NMR spectrum of **31**

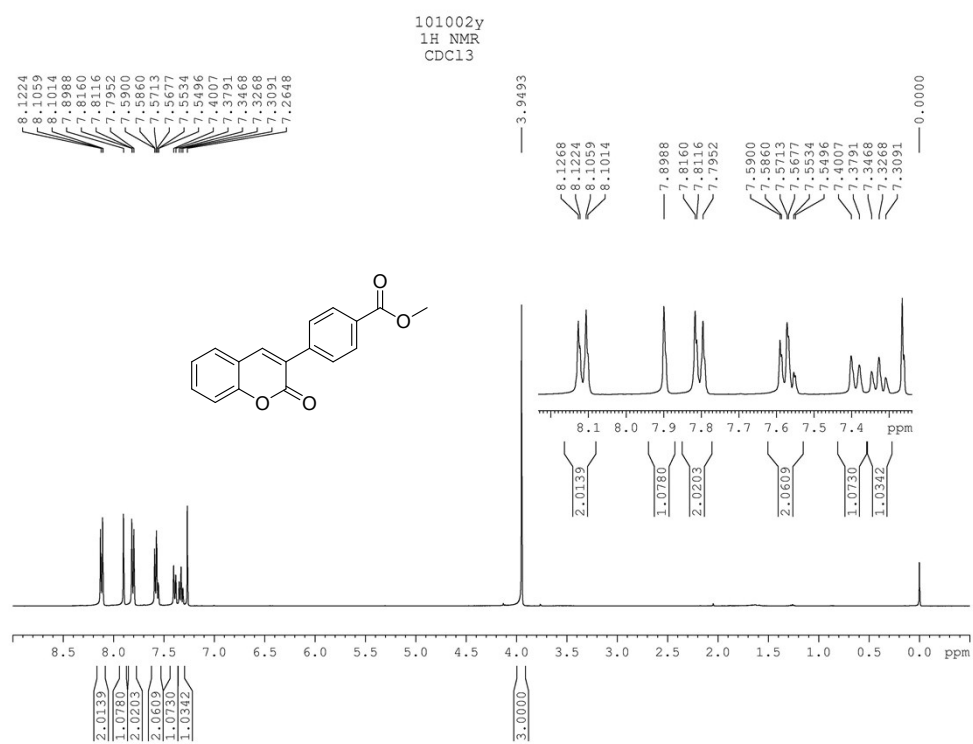

Fig. S28 <sup>1</sup>H NMR spectrum of **3m**



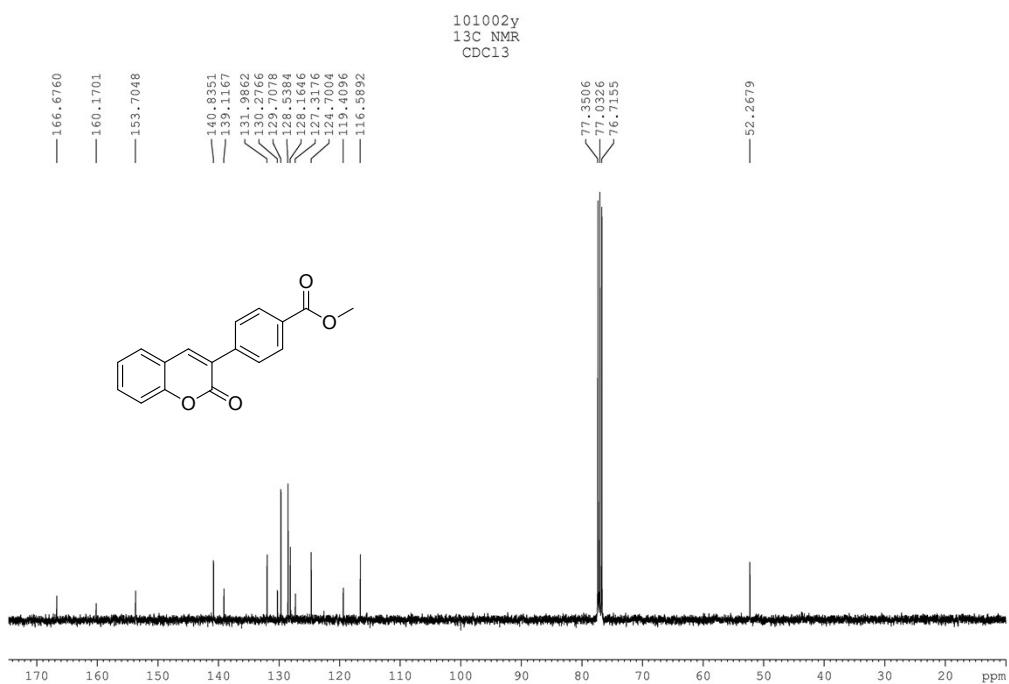

Fig. S29 <sup>13</sup>C NMR spectrum of 3m

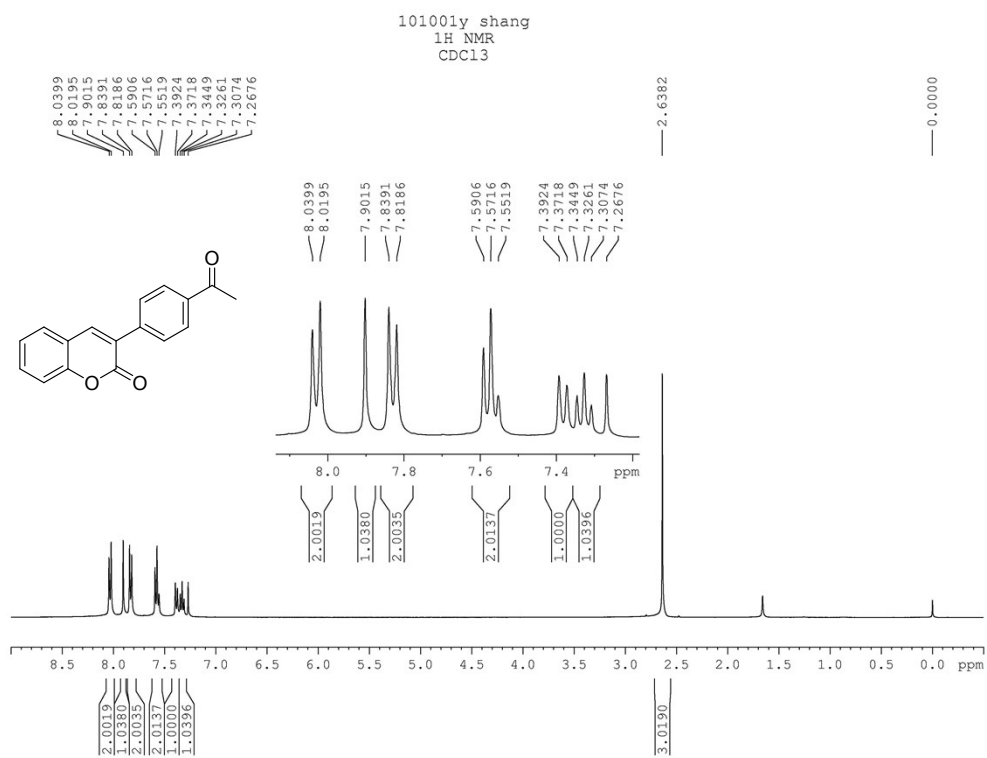

Fig. S30 <sup>1</sup>H NMR spectrum of 3n

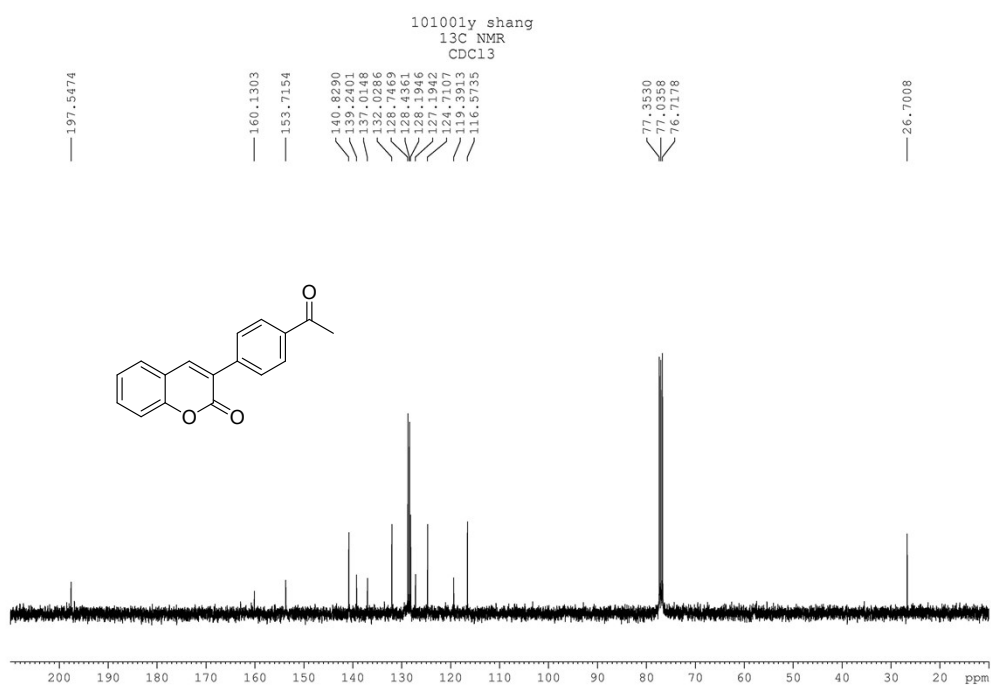

Fig. S31 <sup>13</sup>C NMR spectrum of 3n

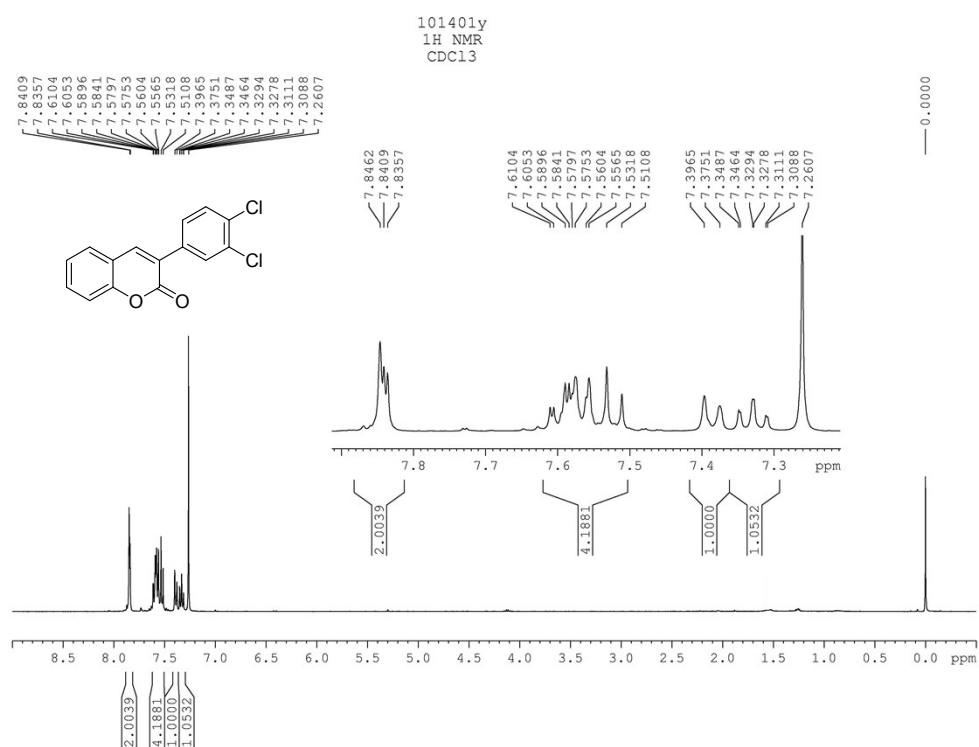

Fig. S32 <sup>1</sup>H NMR spectrum of 3o

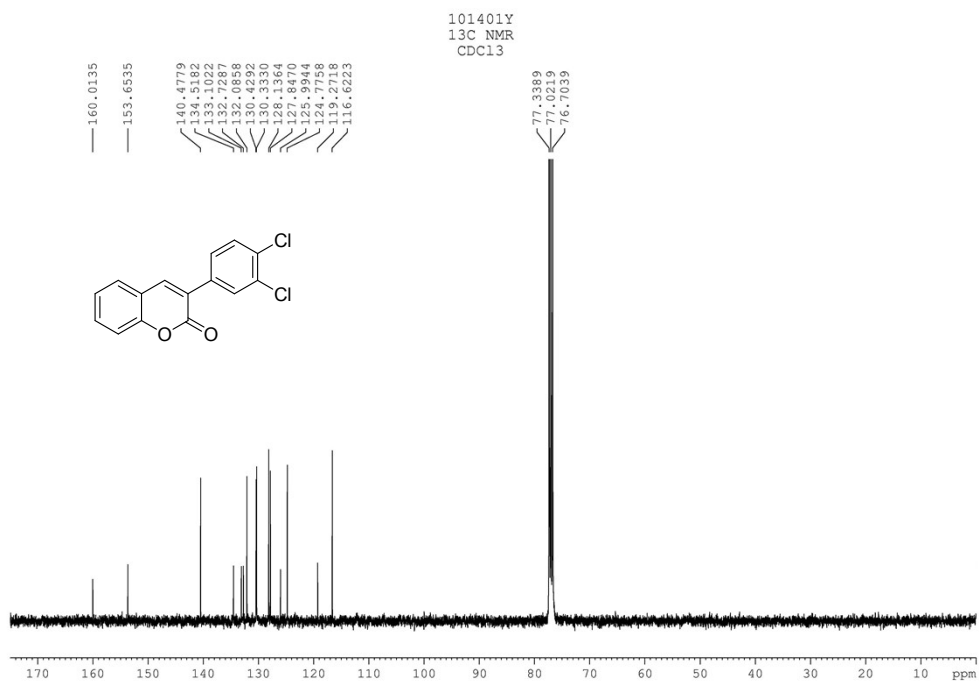

Fig. S33 <sup>13</sup>C NMR spectrum of **3o**

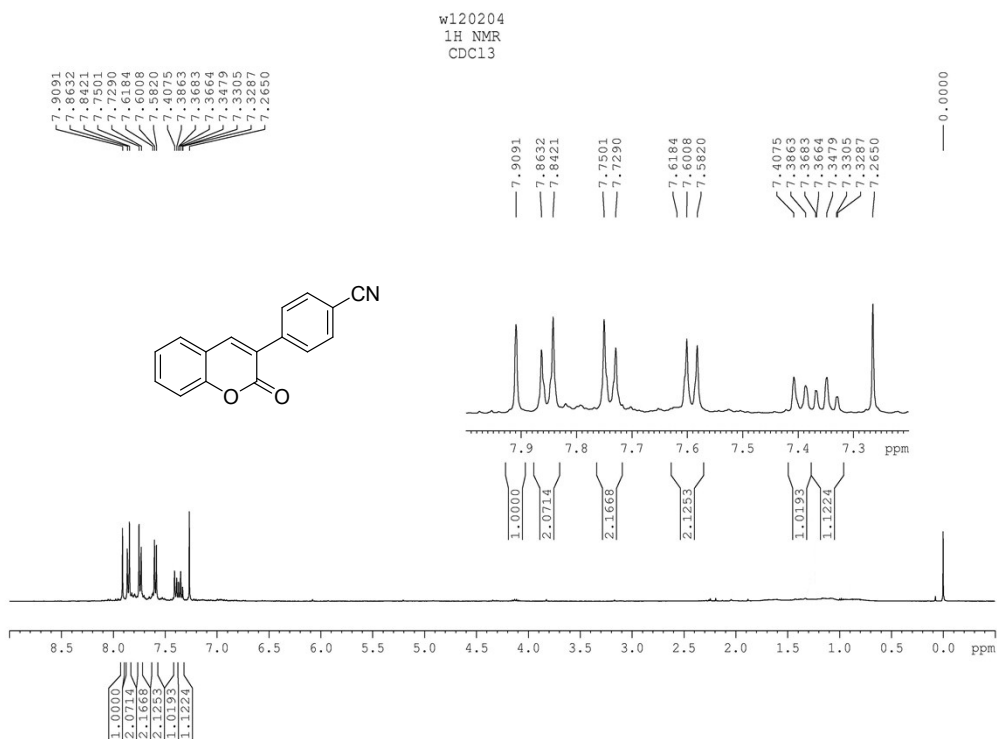

Fig. S34 <sup>1</sup>H NMR spectrum of **3p**

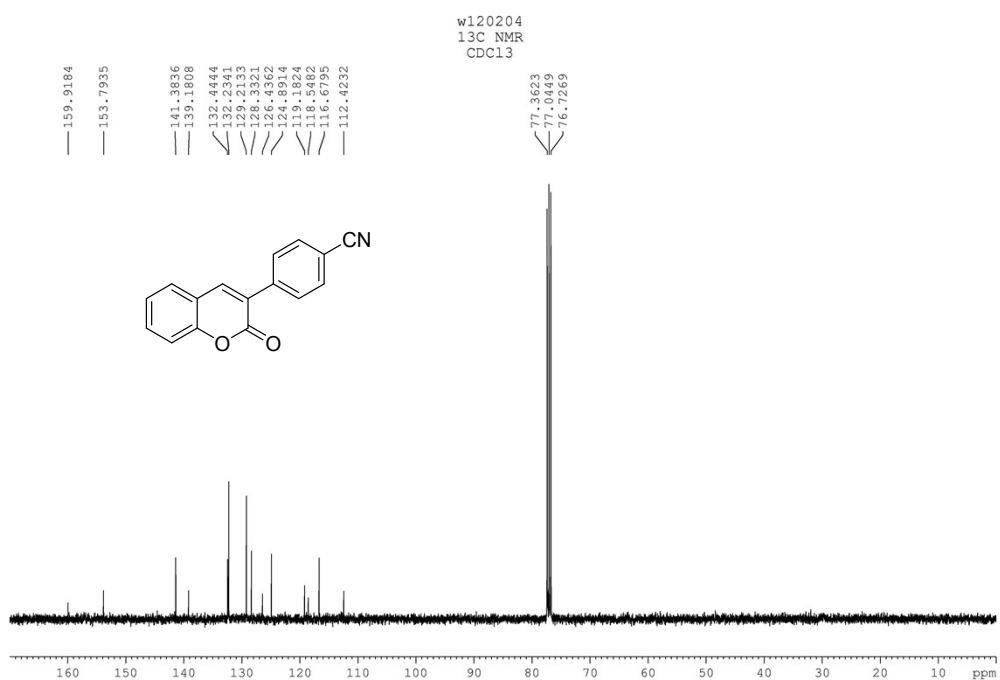

Fig. S35 <sup>13</sup>C NMR spectrum of 3p

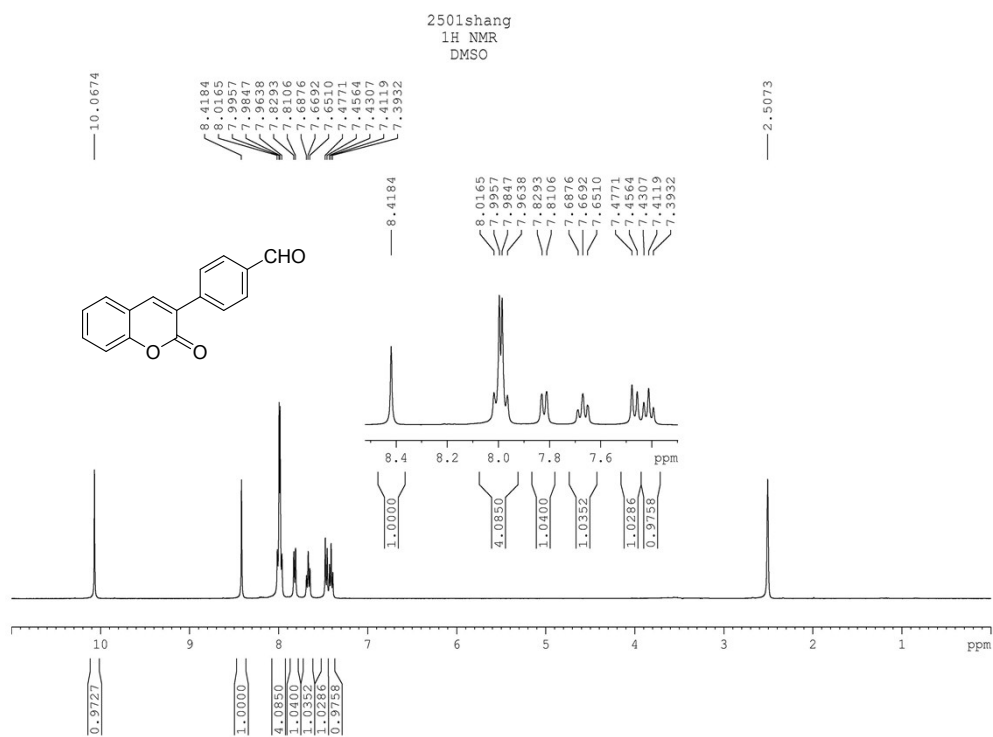

Fig. S36 <sup>1</sup>H NMR spectrum of 3q

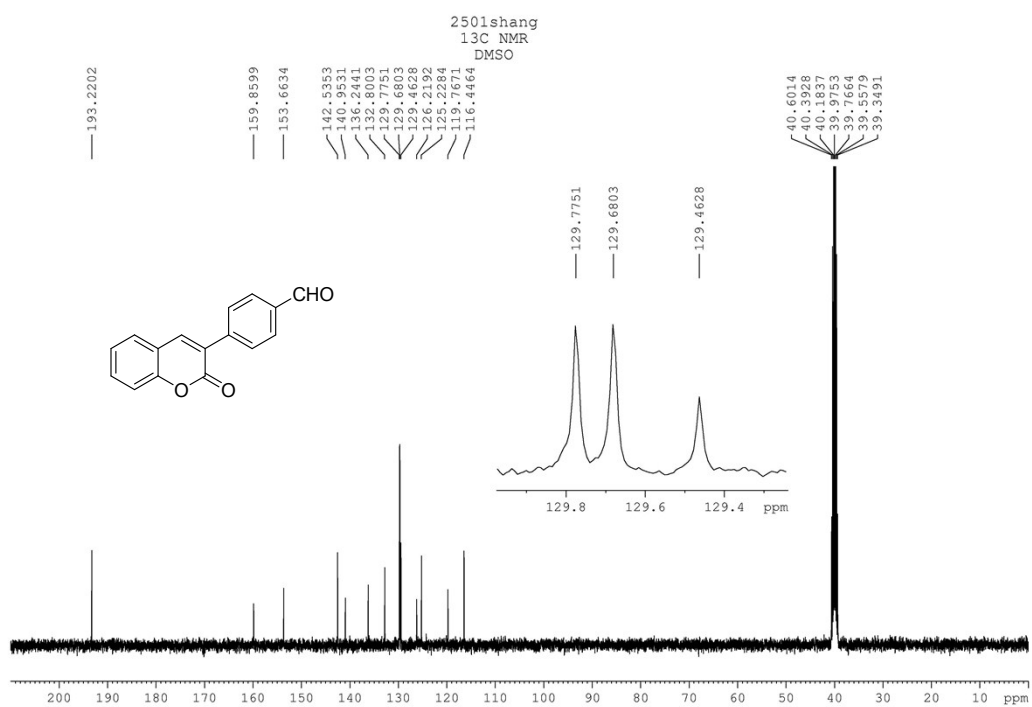

Fig. S37 <sup>13</sup>C NMR spectrum of 3q

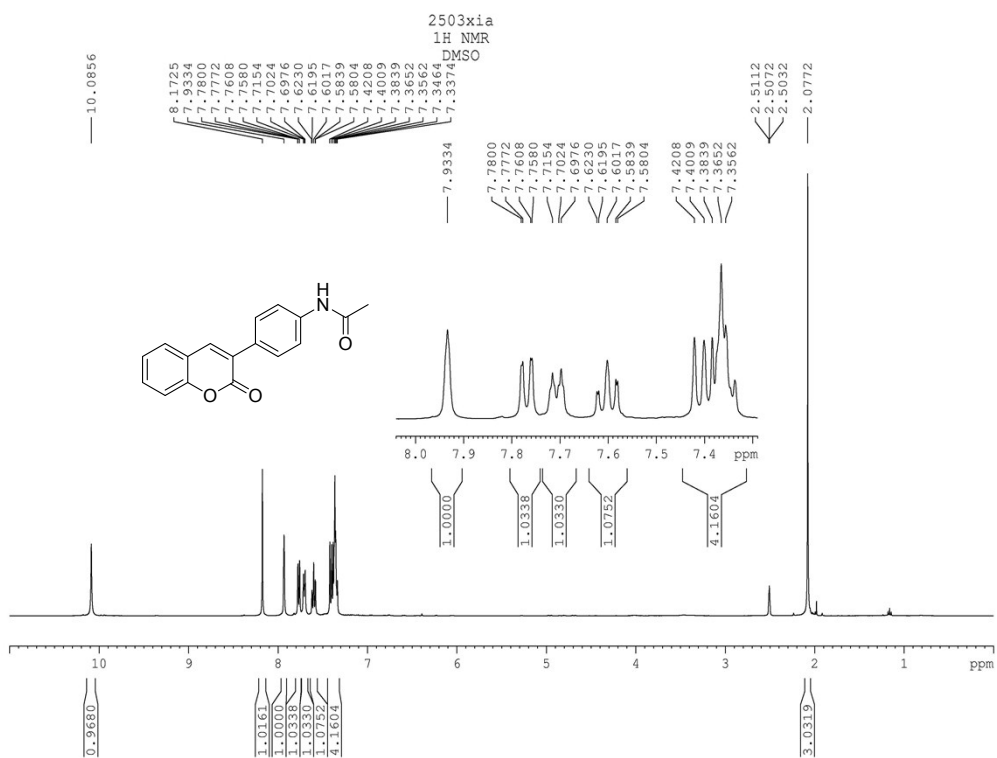

Fig. S38 <sup>1</sup>H NMR spectrum of 3r

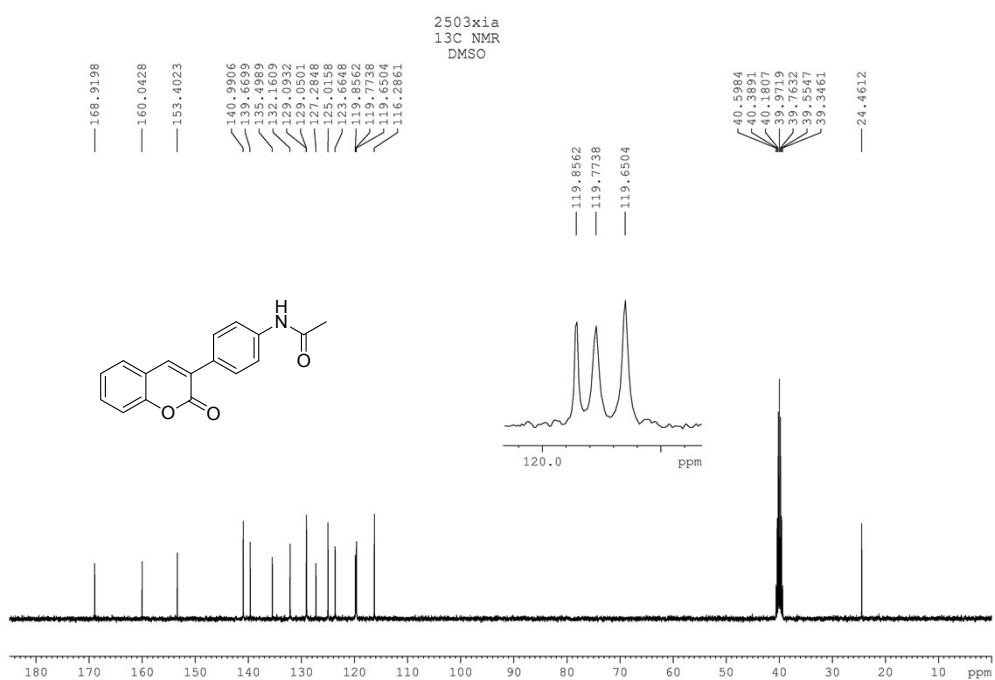

Fig. S39 <sup>13</sup>C NMR spectrum of 3r

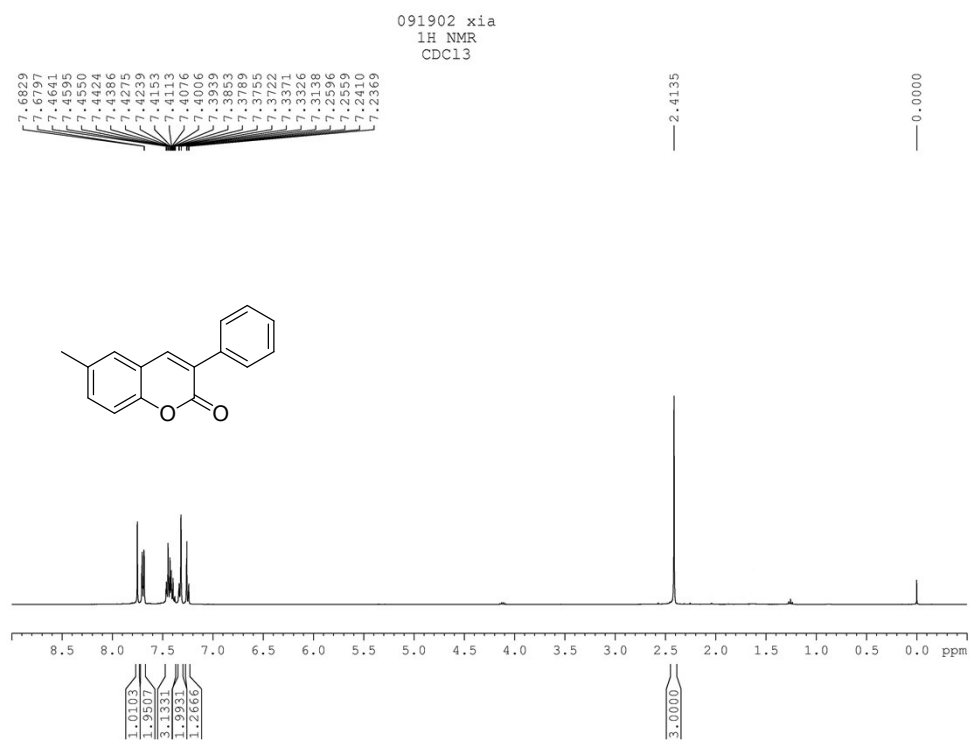

Fig. S40 <sup>1</sup>H NMR spectrum of 3s

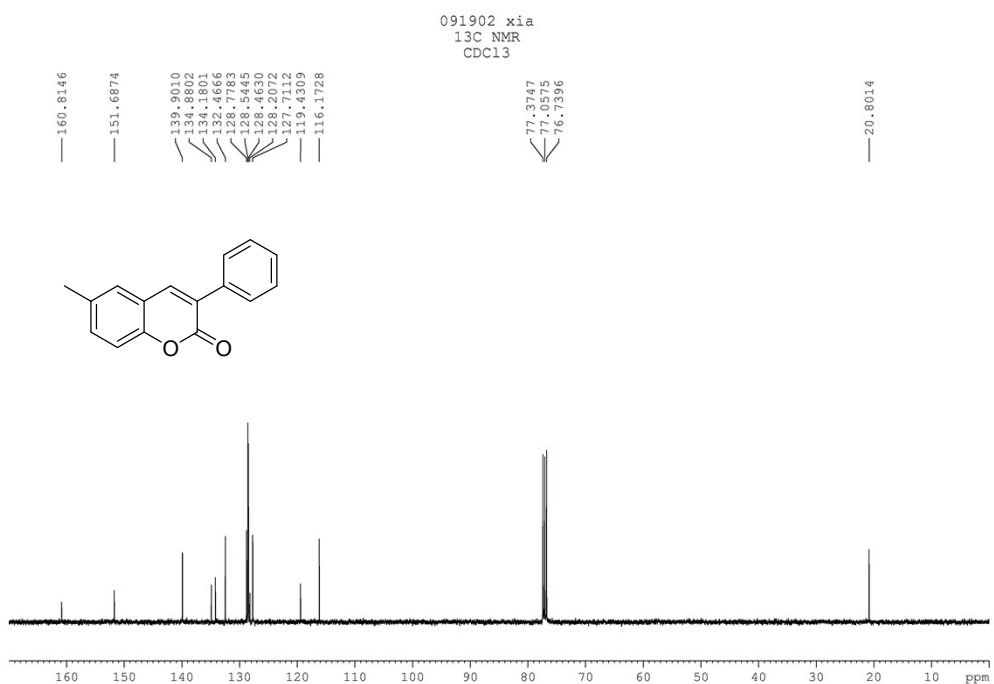

Fig. S41 <sup>13</sup>C NMR spectrum of 3s

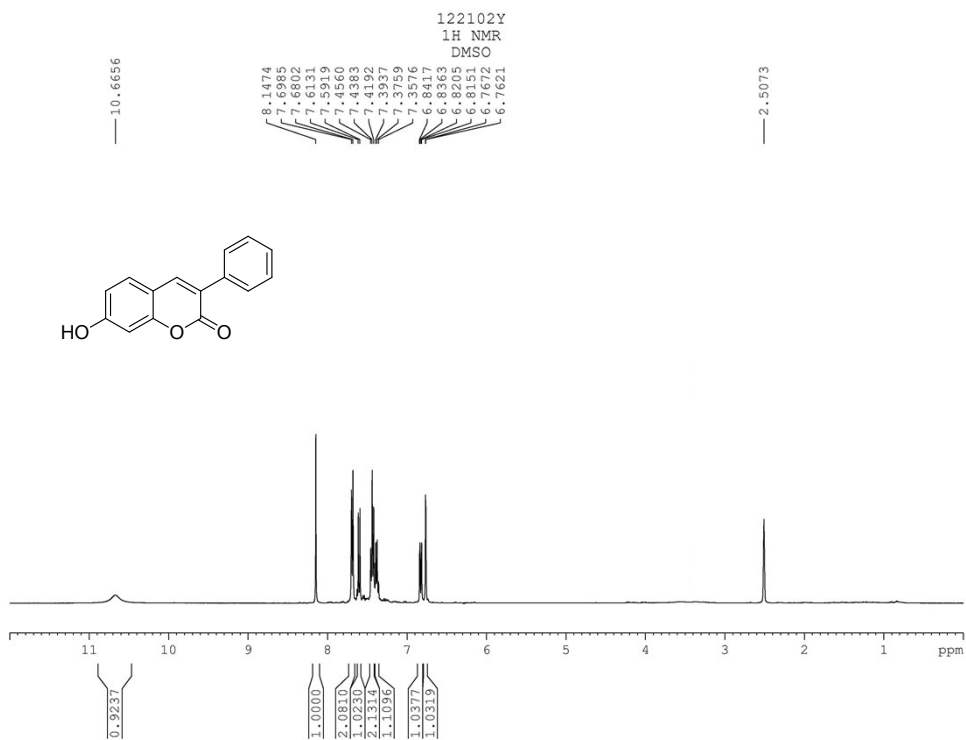

Fig. S42 <sup>1</sup>H NMR spectrum of 3t

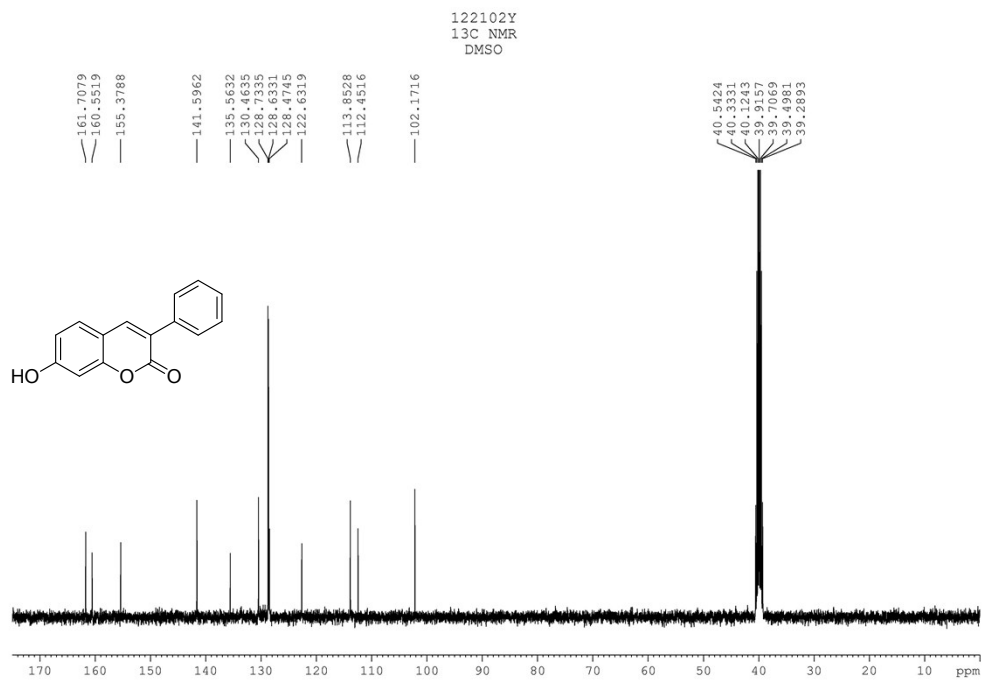

Fig. S43 <sup>13</sup>C NMR spectrum of 3t

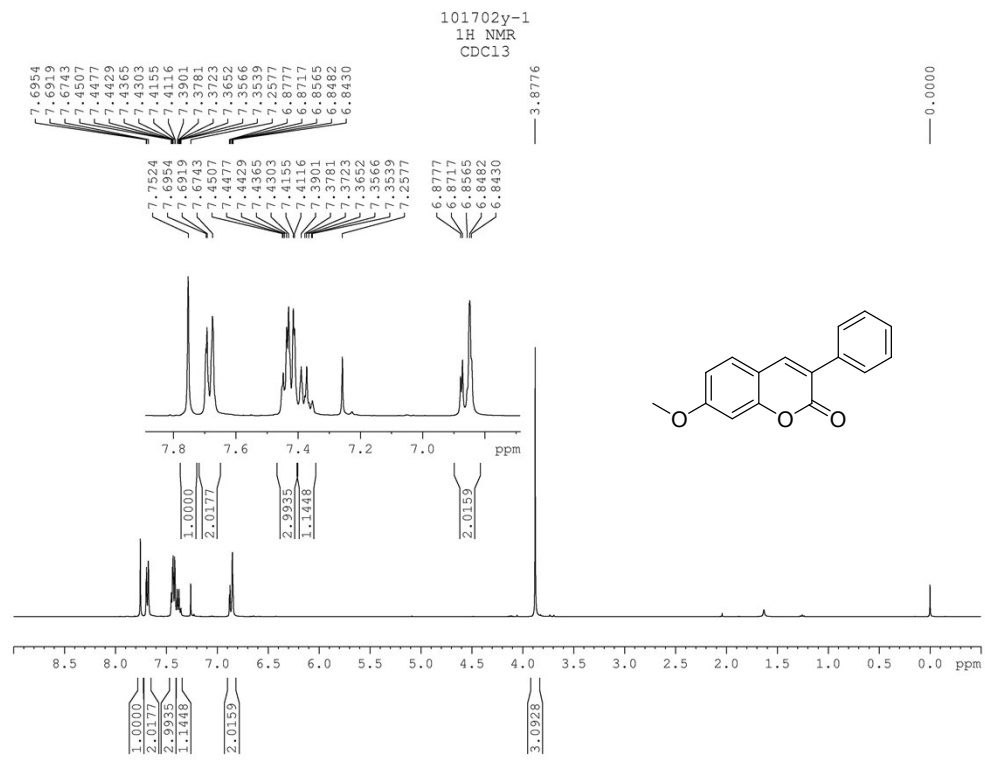

Fig. S44 <sup>1</sup>H NMR spectrum of 3u



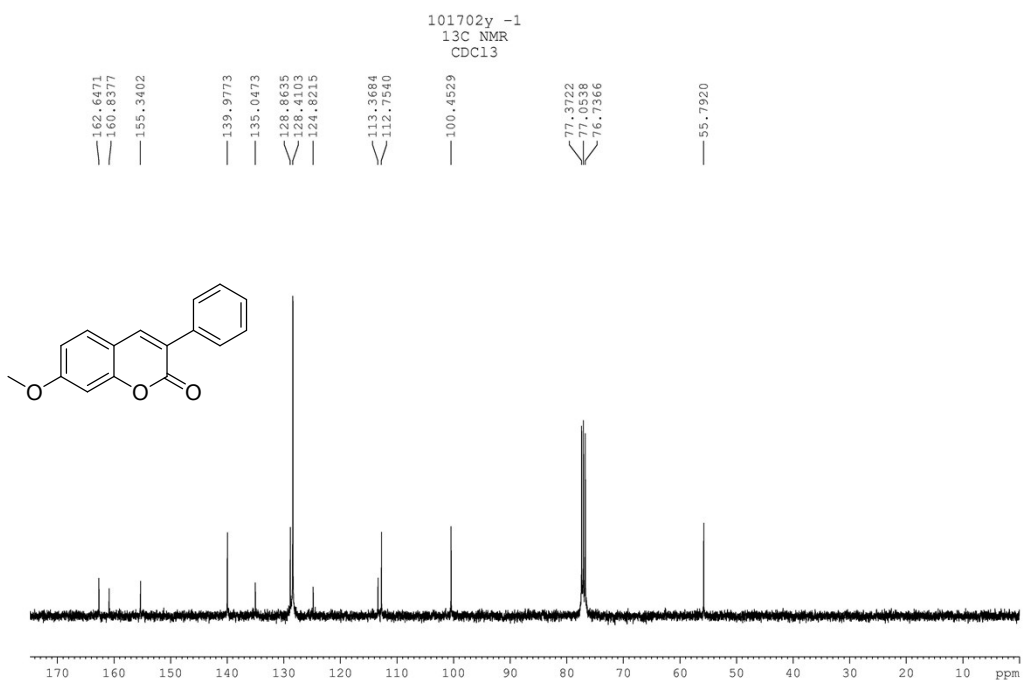

Fig. S45 <sup>13</sup>C NMR spectrum of 3u

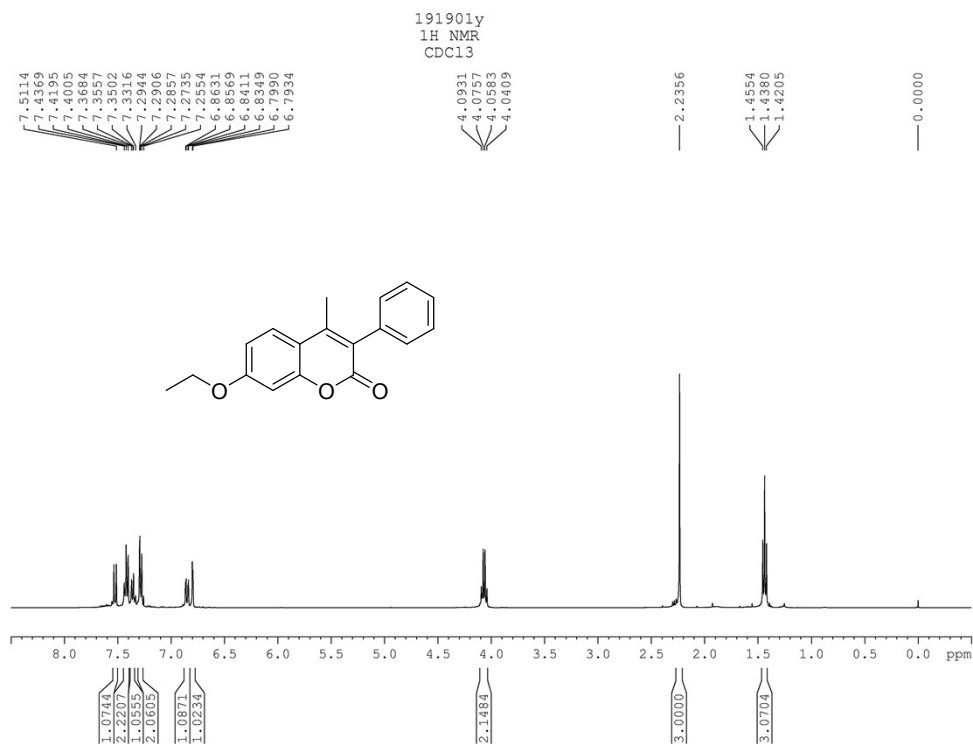

Fig. S46 <sup>1</sup>H NMR spectrum of 3w

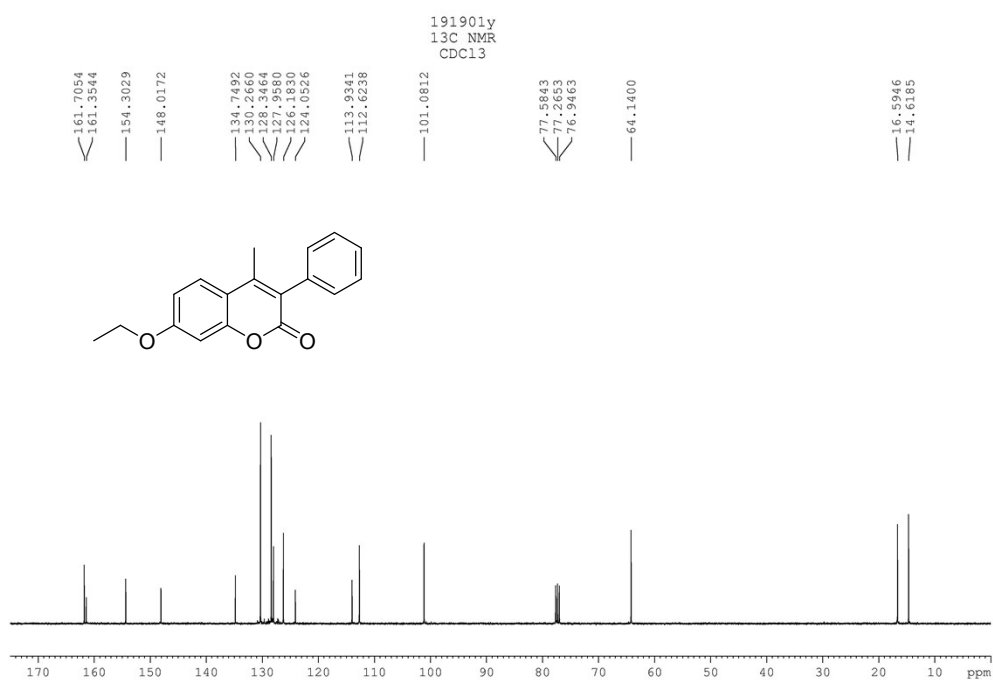

Fig. S47 <sup>13</sup>C NMR spectrum of **3w**

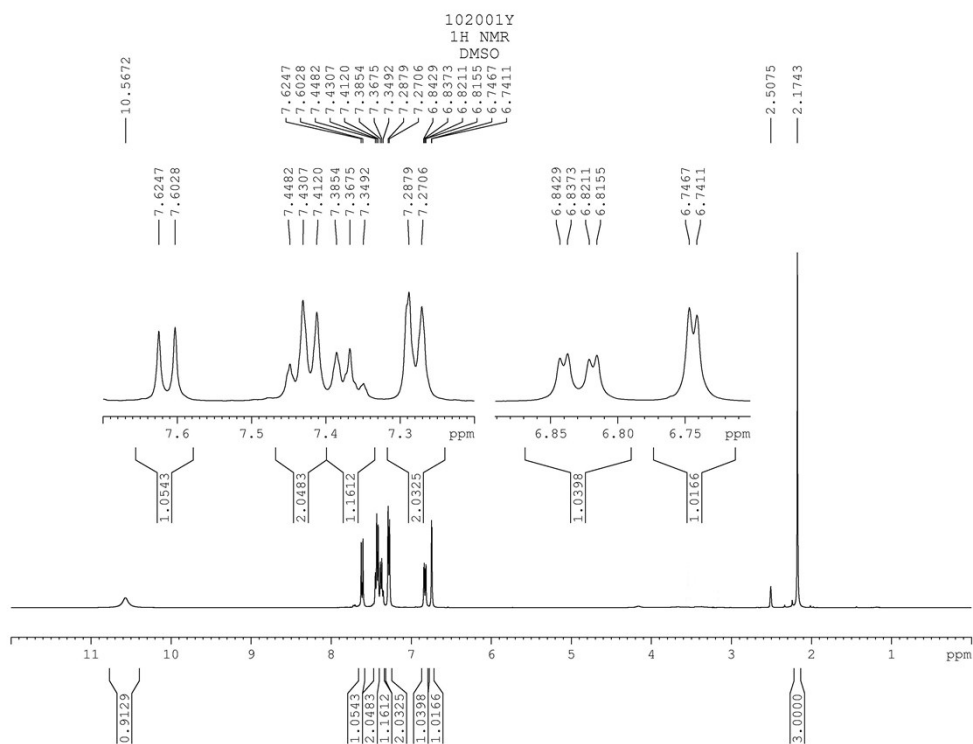

Fig. S48 <sup>1</sup>H NMR spectrum of **3x**

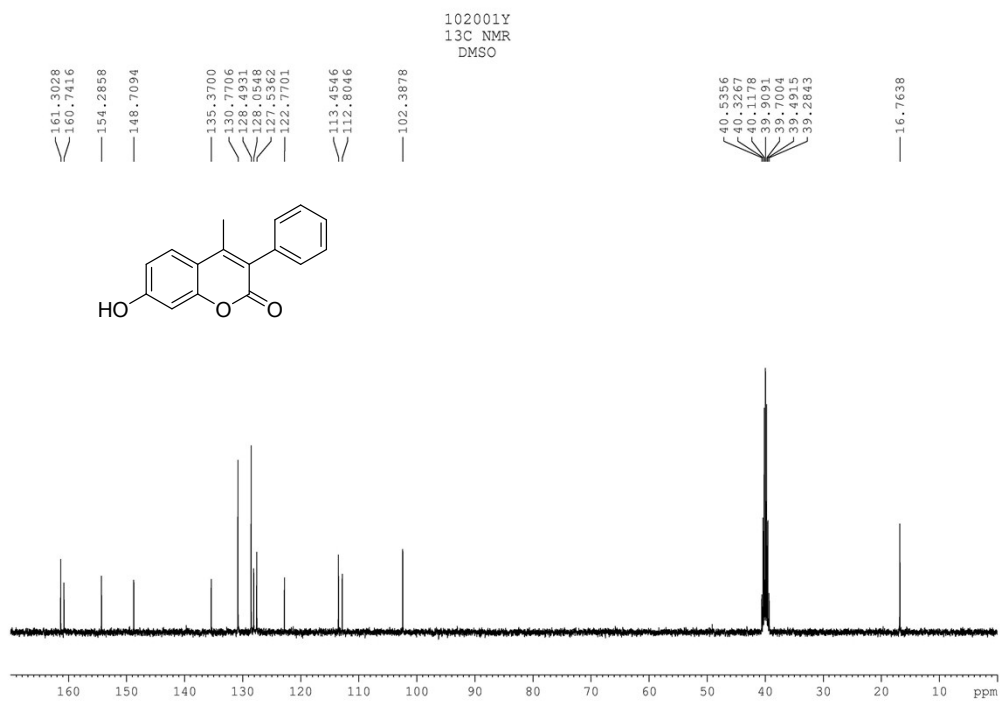

Fig. S49 <sup>13</sup>C NMR spectrum of 3x

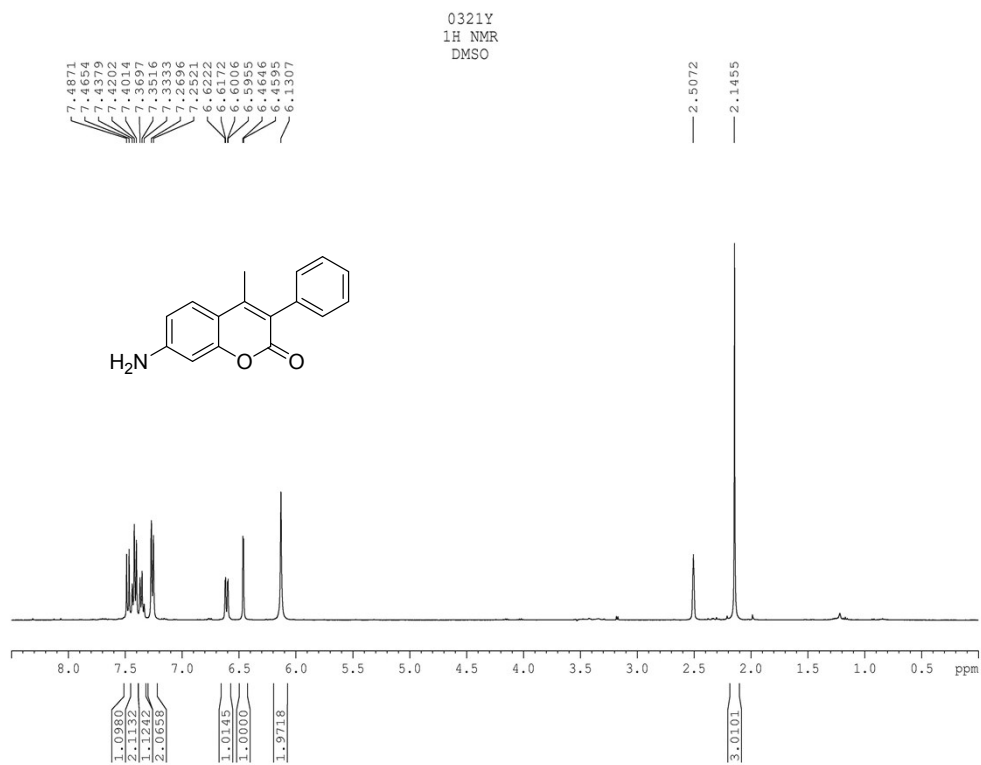

Fig. S50 <sup>1</sup>H NMR spectrum of 3y

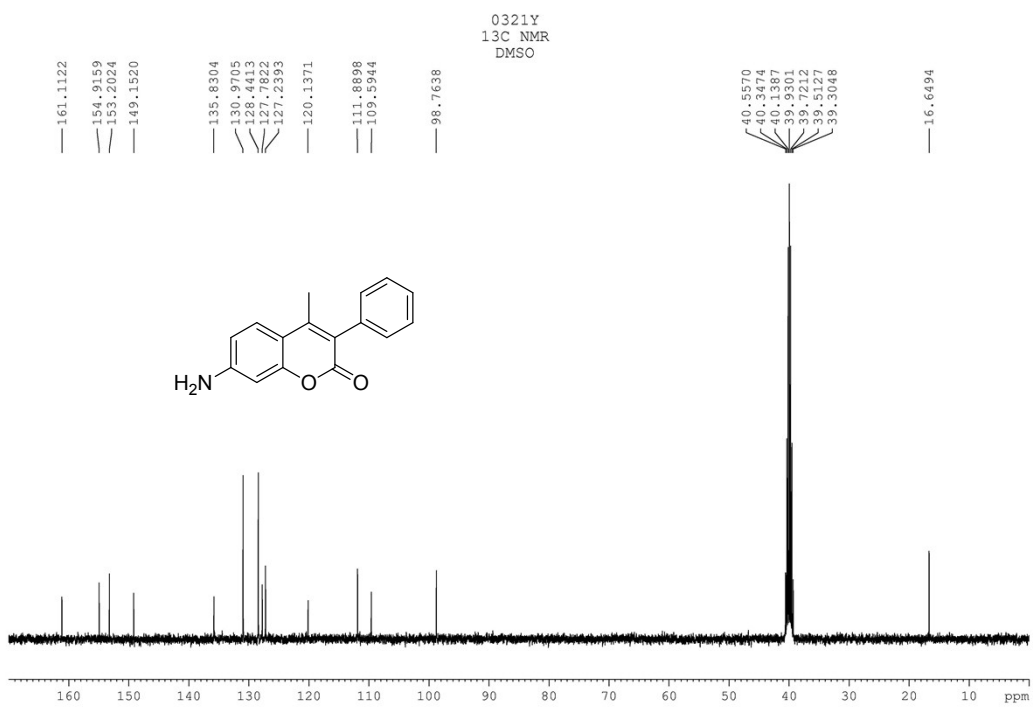

Fig. S51 <sup>13</sup>C NMR spectrum of **3y**

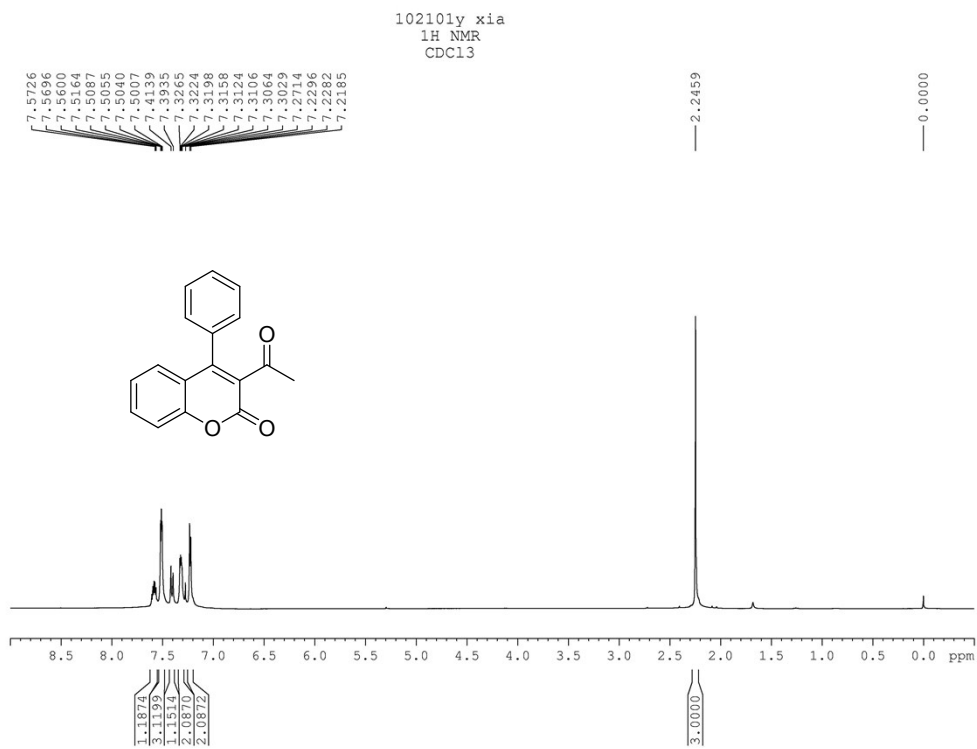

Fig. S52 <sup>1</sup>H NMR spectrum of **3z**

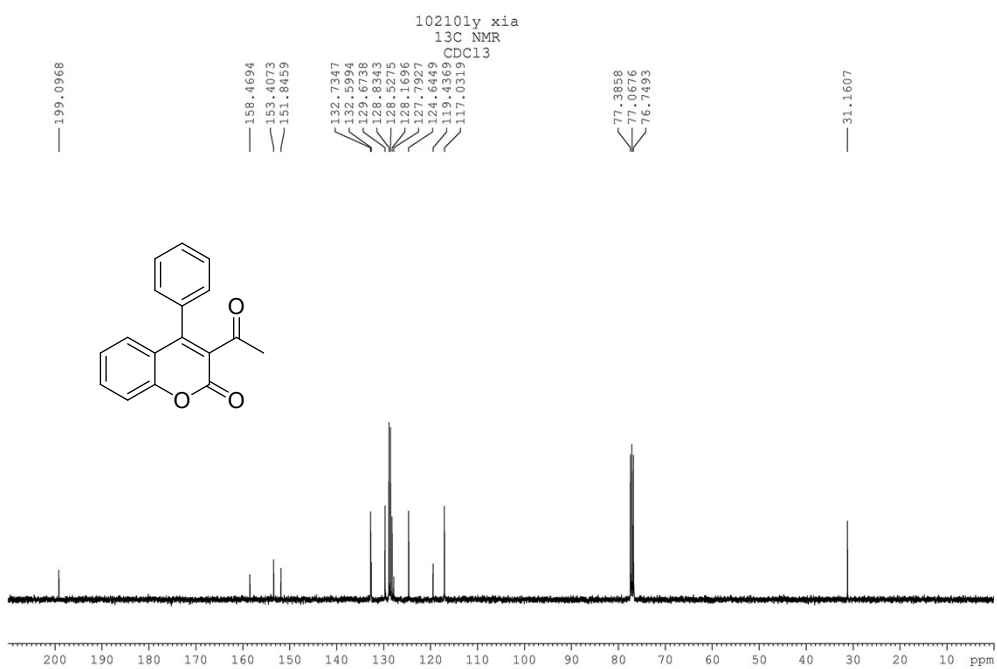

Fig. S53 <sup>13</sup>C NMR spectrum of 3z

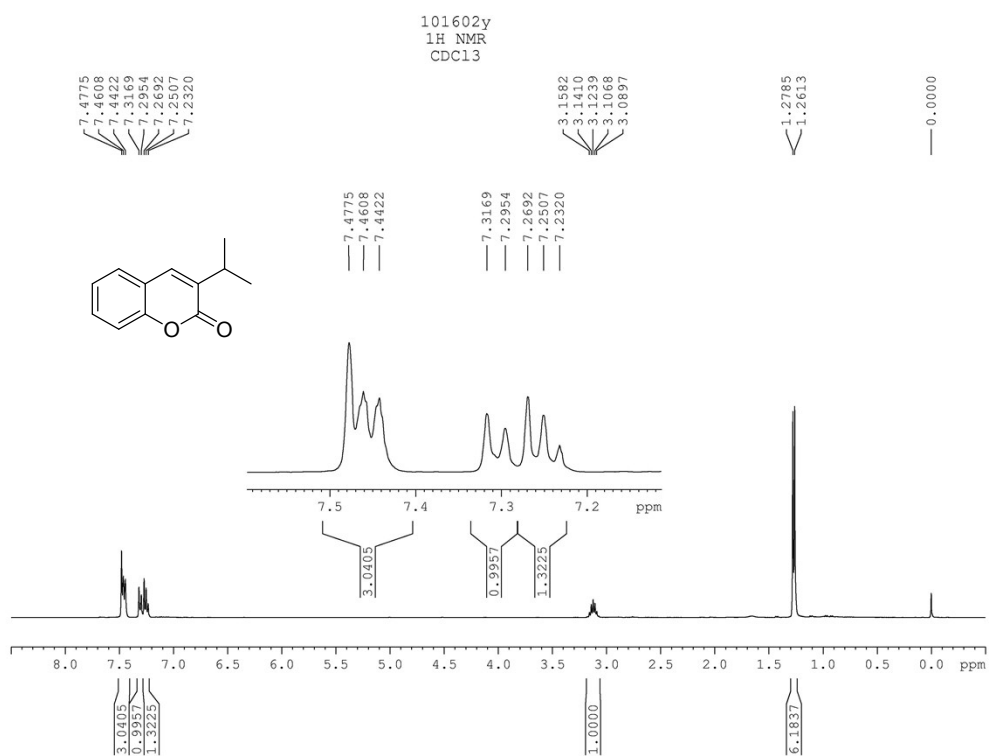

Fig. S54 <sup>1</sup>H NMR spectrum of 3zz

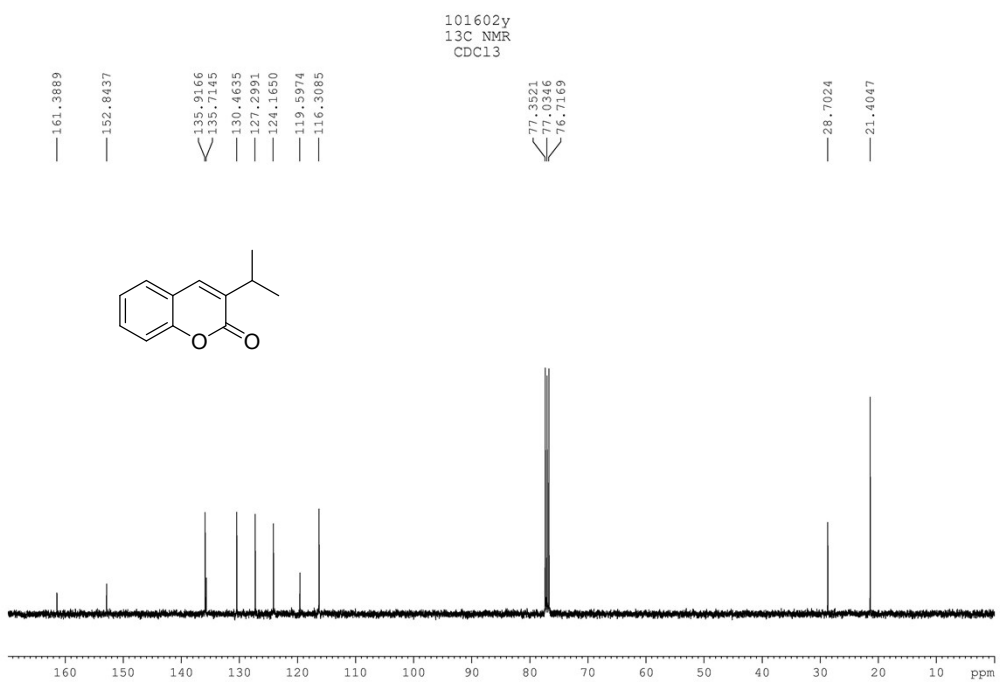

Fig. S55 <sup>13</sup>C NMR spectrum of 3zz

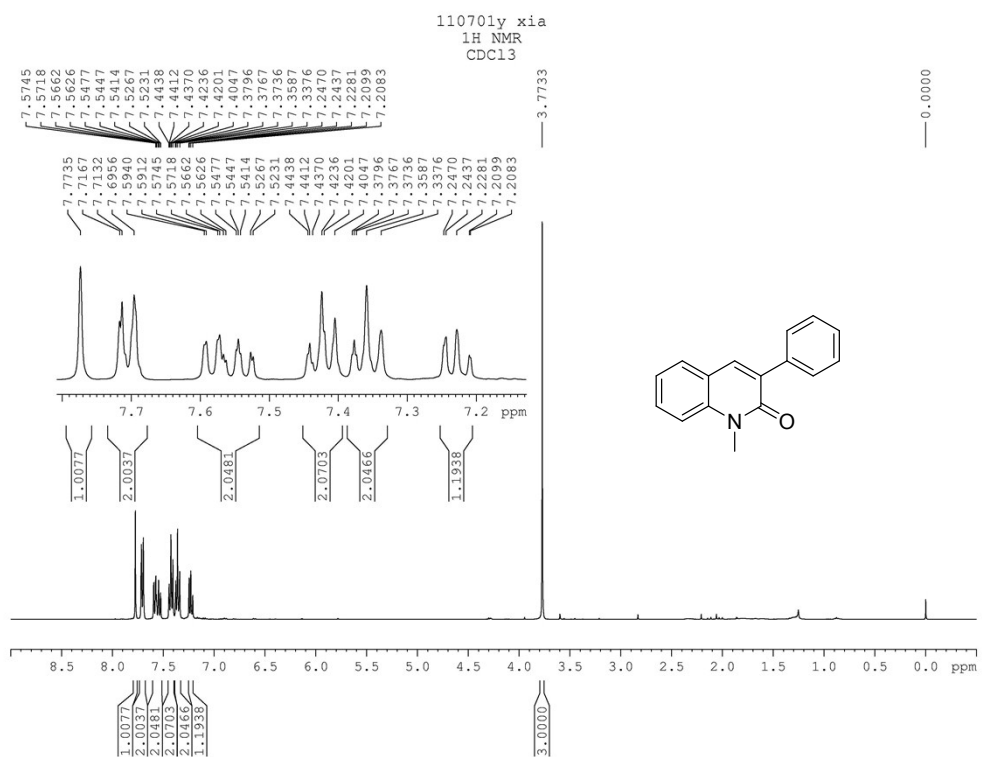

Fig. S56 <sup>1</sup>H NMR spectrum of 5a

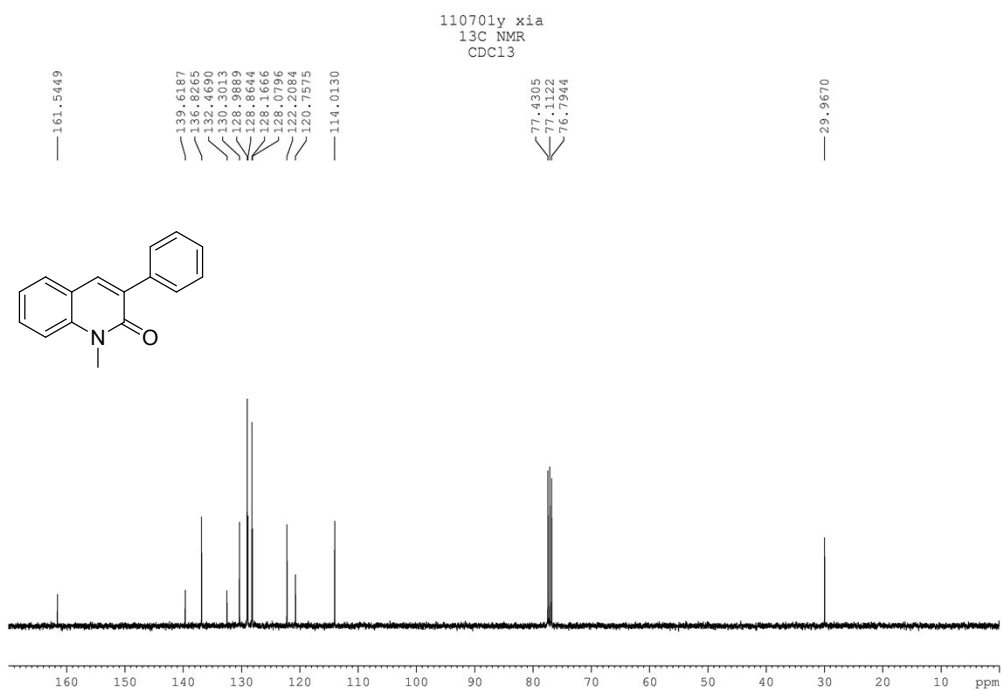

Fig. S57 <sup>13</sup>C NMR spectrum of 5a

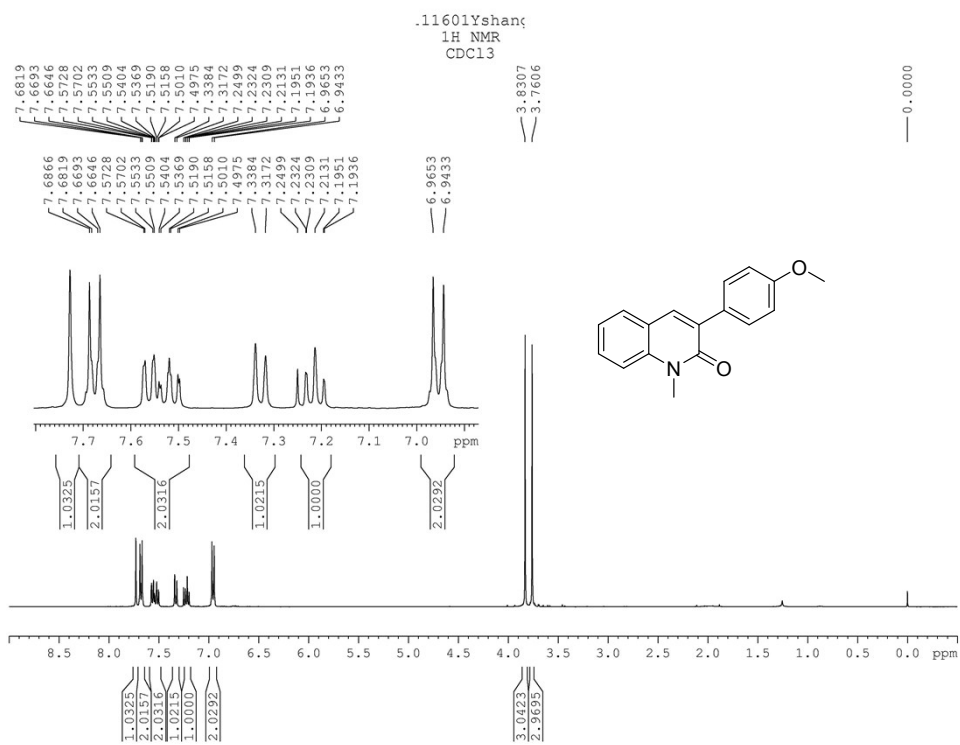

Fig. S58 <sup>1</sup>H NMR spectrum of 5b

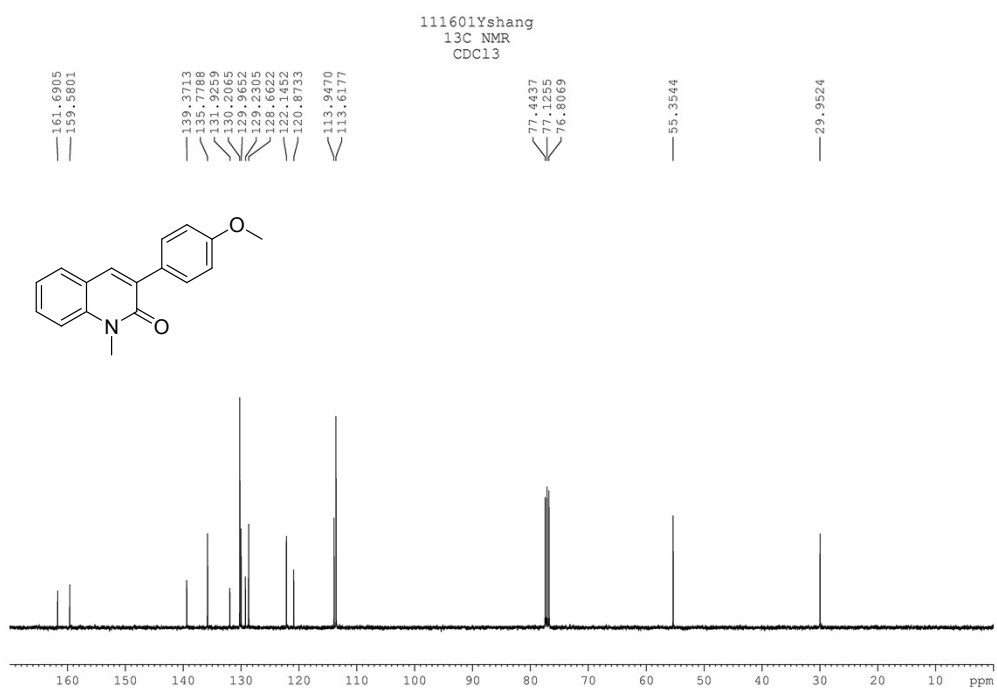

Fig. S59 <sup>13</sup>C NMR spectrum of 5b

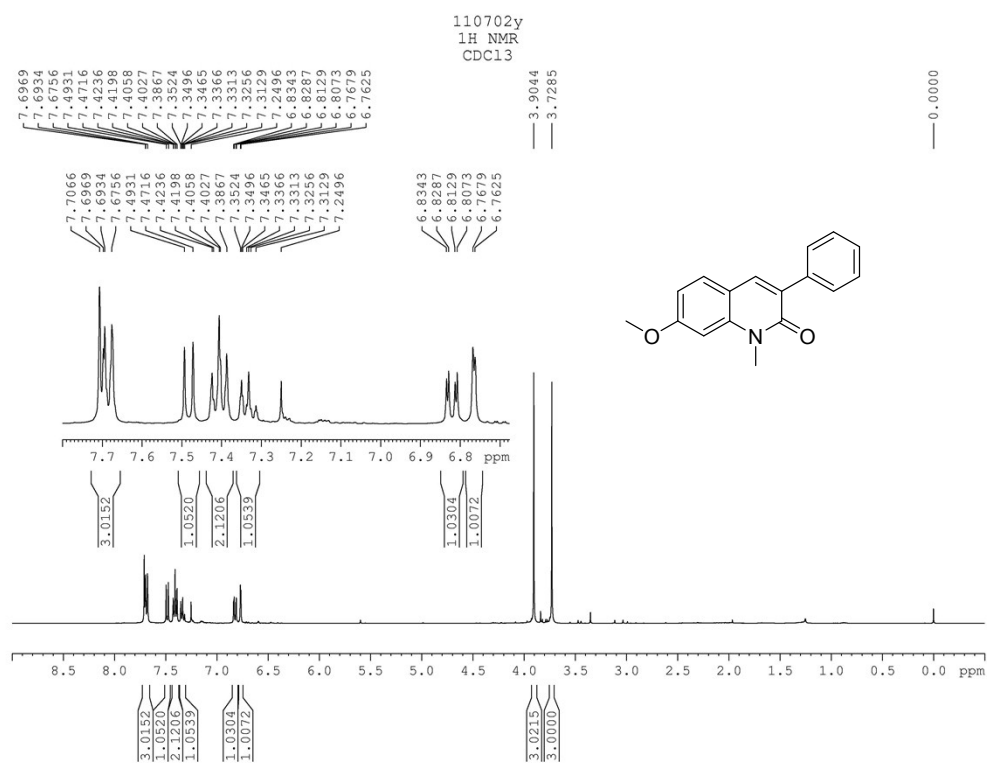

Fig. S60 <sup>1</sup>H NMR spectrum of 5c



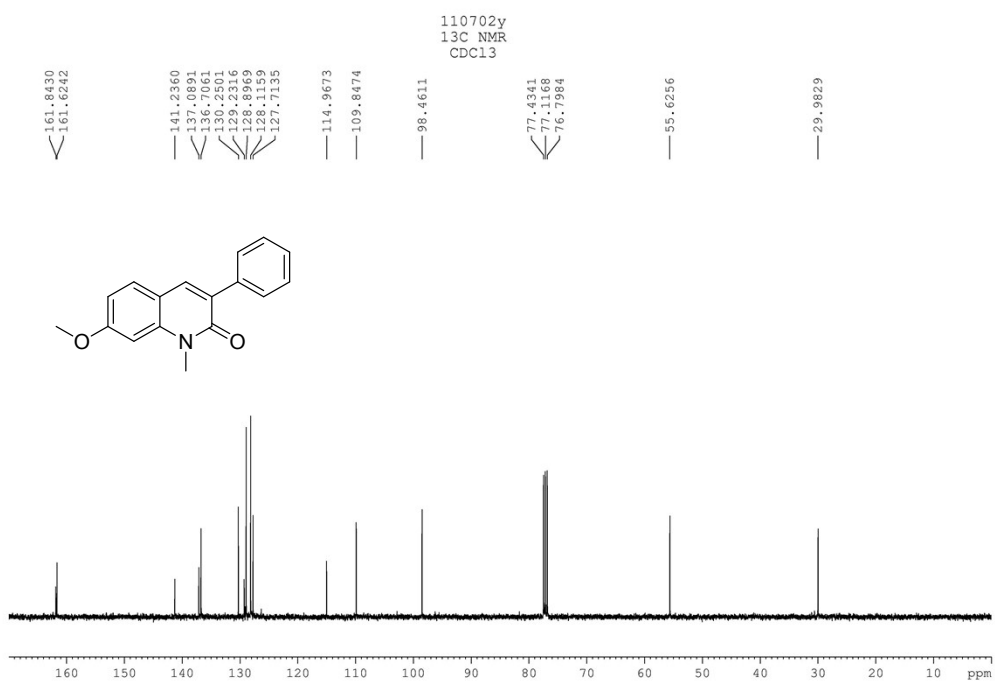

Fig. S61 <sup>13</sup>C NMR spectrum of 5c

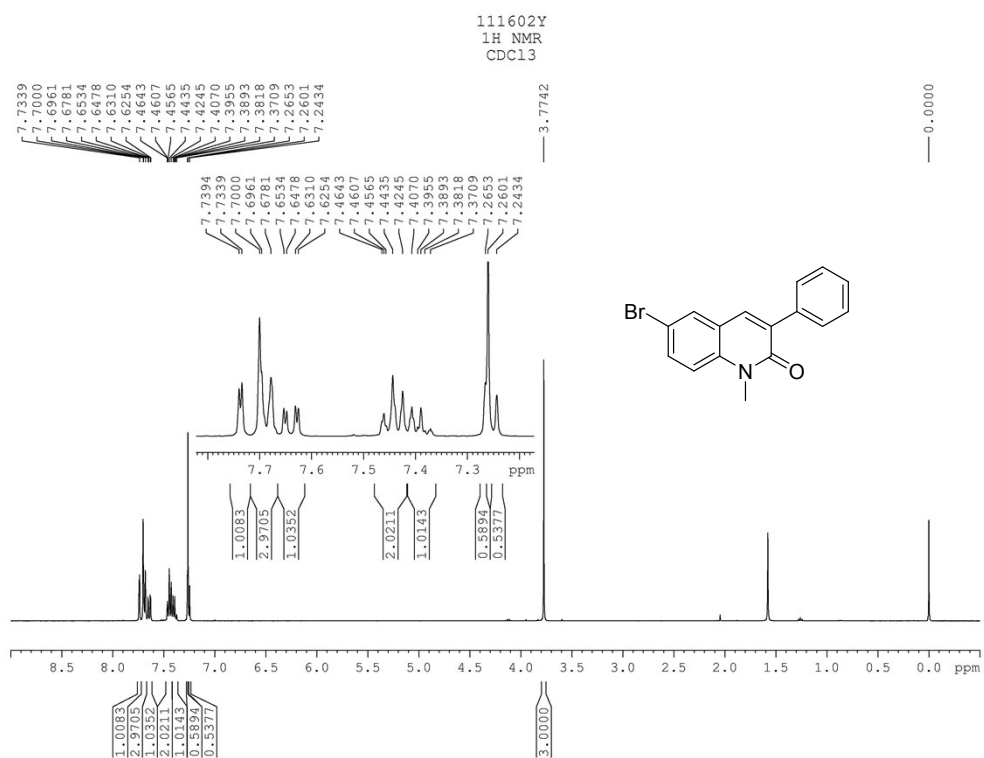

Fig. S62 <sup>1</sup>H NMR spectrum of 5d

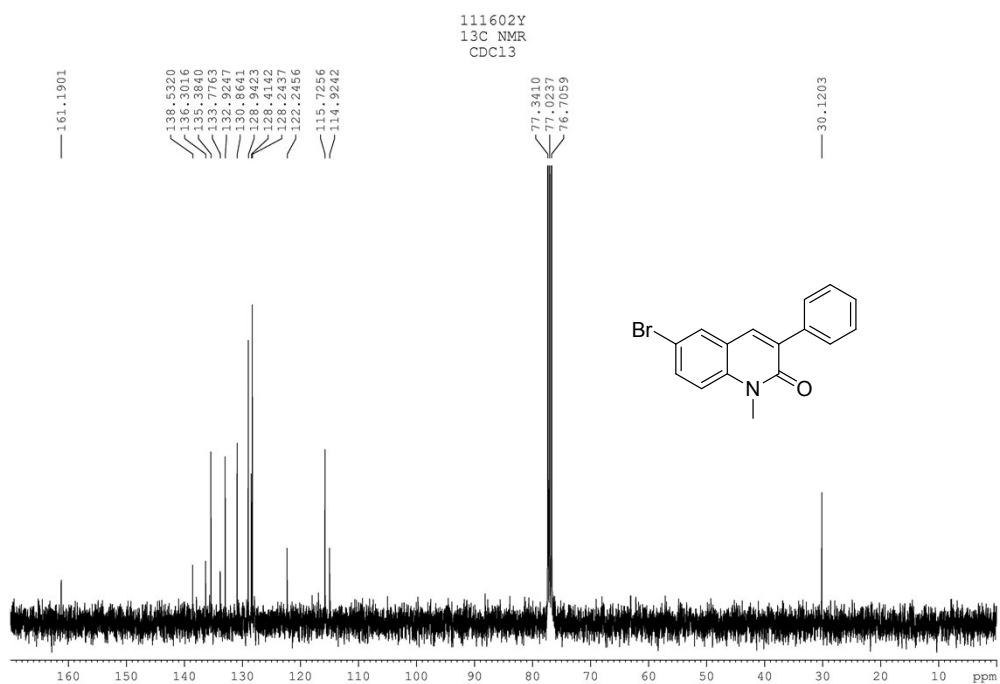

Fig. S63 <sup>13</sup>C NMR spectrum of 5d

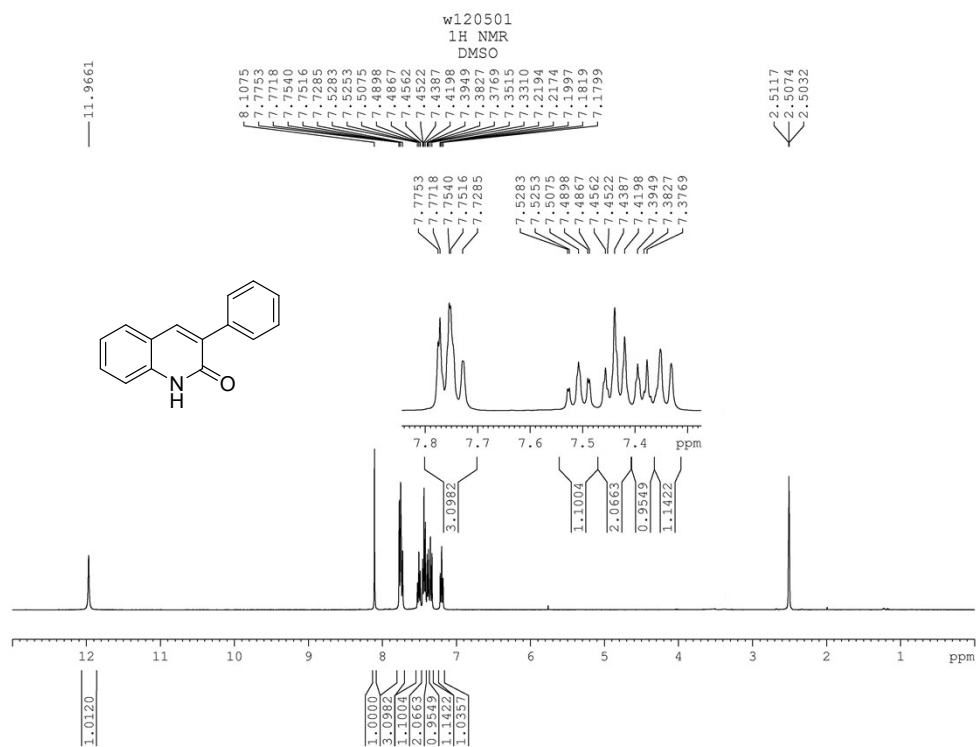

Fig. S64 <sup>1</sup>H NMR spectrum of 5e

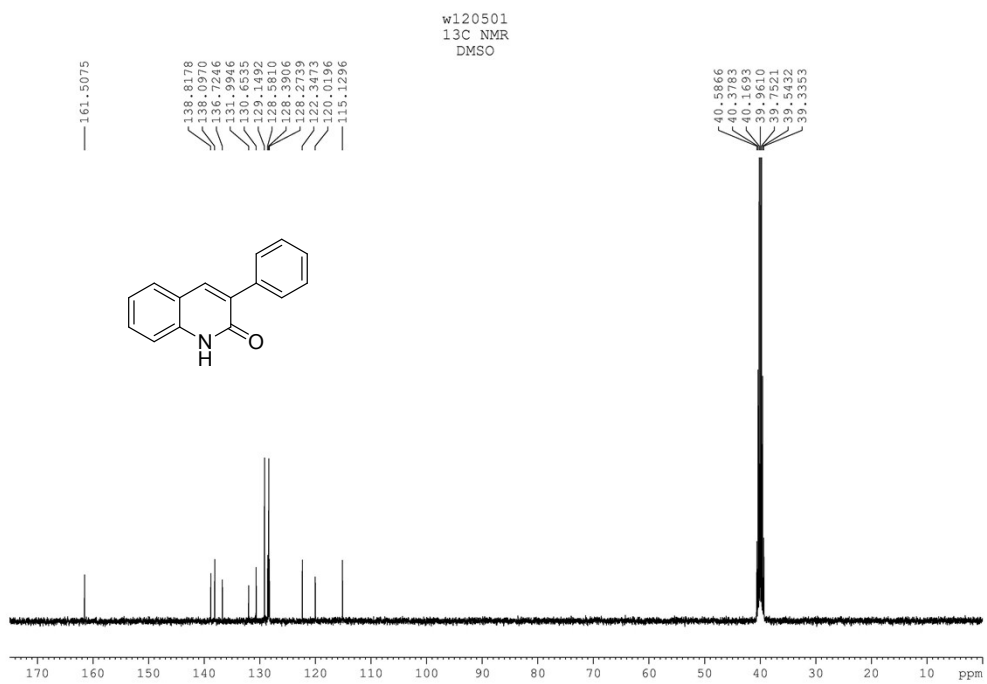

Fig. S65 <sup>13</sup>C NMR spectrum of 5e
